# Supplementary material
Source: publisher figshare collection journal article supplement (https://tandf.figshare.com/articles/dataset/_/8957024)
Supplement: Supplementary file 1 [file 16378313]

---

## **Cross-sectional survey of pet ownership, veterinary service utilisation, and pet-related expenditures in New Zealand**

**MC Gates<sup>\*§</sup>, J Walker<sup>†</sup>, S Zito<sup>‡</sup> and A Dale<sup>‡</sup>**

<sup>\*</sup> School of Veterinary Science, Massey University, Private Bag 11-222, Palmerston North, 4442, New Zealand

<sup>†</sup> New Zealand Companion Animal Council, PO Box 4, Waiuku, Auckland, 2341, New Zealand

<sup>‡</sup> RNZSPCA, PO Box 15-309, New Lynn, Auckland, 0640, New Zealand

<sup>§</sup> Corresponding author. E-mail: [c.gates@massey.ac.nz](mailto:c.gates@massey.ac.nz)

---

### **Supplementary Table 1. Data fields and categories used for the analysis of responses to an cross-sectional survey of companion animal owners in New Zealand.**

| ID  | Type    | Name                                                                                             | Levels                    |
|-----|---------|--------------------------------------------------------------------------------------------------|---------------------------|
| L#  | Numeric | A1. Area                                                                                         | {1, Auckland}...          |
| M#  | Numeric | A2. Type of location                                                                             | {1, Urban/City}...        |
| N#  | Numeric | A3. Age                                                                                          | {1, 17 years or under}... |
| O#  | Numeric | A4. Sex                                                                                          | {1, Male}...              |
| P#A | Numeric | A5. Ethnic group - New Zealand European                                                          | {0, NO}...                |
| P#B | Numeric | A5. Ethnic group - Maori                                                                         | {0, NO}...                |
| P#C | Numeric | A5. Ethnic group - Asian                                                                         | {0, NO}...                |
| P#D | Numeric | A5. Ethnic group - Pacific Island                                                                | {0, NO}...                |
| P#E | Numeric | A5. Ethnic group - Other                                                                         | {0, NO}...                |
| Q#  | String  | OA5. Other ethnic group                                                                          | None                      |
| R#A | Numeric | A6. Pets in household - Bird                                                                     | {0, NO}...                |
| R#B | Numeric | A6. Pets in household - Cat                                                                      | {0, NO}...                |
| R#C | Numeric | A6. Pets in household - Dog                                                                      | {0, NO}...                |
| R#D | Numeric | A6. Pets in household - Fish                                                                     | {0, NO}...                |
| R#E | Numeric | A6. Pets in household - Pony/ Horse                                                              | {0, NO}...                |
| R#F | Numeric | A6. Pets in household - Rabbit                                                                   | {0, NO}...                |
| R#G | Numeric | A6. Pets in household - Other small mammal<br>(e.g. rat or mouse)                                | {0, NO}...                |
| R#H | Numeric | A6. Pets in household - Reptile                                                                  | {0, NO}...                |
| R#I | Numeric | A6. Pets in household - Other                                                                    | {0, NO}...                |
| R#J | Numeric | A6. Pets in household - None                                                                     | {0, NO}...                |
| S#  | String  | OA6. Other pets in household                                                                     | None                      |
| T#  | Numeric | A7. Would like to have a pet                                                                     | {1, Yes}...               |
| U#A | Numeric | A8. Type of pet would like to have - Bird                                                        | {0, NO}...                |
| U#B | Numeric | A8. Type of pet would like to have - Cat                                                         | {0, NO}...                |
| U#C | Numeric | A8. Type of pet would like to have - Dog                                                         | {0, NO}...                |
| U#D | Numeric | A8. Type of pet would like to have - Fish                                                        | {0, NO}...                |
| U#E | Numeric | A8. Type of pet would like to have - Pony/ Horse                                                 | {0, NO}...                |
| U#F | Numeric | A8. Type of pet would like to have - Rabbit                                                      | {0, NO}...                |
| U#G | Numeric | A8. Type of pet would like to have - Other small<br>mammal (e.g. rat or mouse)                   | {0, NO}...                |
| U#H | Numeric | A8. Type of pet would like to have - Reptile                                                     | {0, NO}...                |
| U#I | Numeric | A8. Type of pet would like to have - Other                                                       | {0, NO}...                |
| U#J | Numeric | A8. Type of pet would like to have - Dont know                                                   | {0, NO}...                |
| V#  | String  | OA8. Other type of pet would like to have                                                        | None                      |
| W#A | Numeric | A9. Reasons dont currently have a pet - The<br>landlord/ property where I live doesnt allow pets | {0, NO}...                |
| W#B | Numeric | A9. Reasons dont currently have a pet - Cost                                                     | {0, NO}...                |
| W#C | Numeric | A9. Reasons dont currently have a pet -<br>Responsibility                                        | {0, NO}...                |
| W#D | Numeric | A9. Reasons dont currently have a pet - Allergies                                                | {0, NO}...                |
| W#E | Numeric | A9. Reasons dont currently have a pet - Home/<br>Lifestyle not suitable                          | {0, NO}...                |

|      |         |                                                                                |             |
|------|---------|--------------------------------------------------------------------------------|-------------|
| W#F  | Numeric | A9. Reasons dont currently have a pet - Other household member doesnt want one | {0, NO}...  |
| W#G  | Numeric | A9. Reasons dont currently have a pet - Other reason                           | {0, NO}...  |
| X#   | String  | OA9. Other reasons dont currently have a pet                                   | None        |
| Y#   | Numeric | A10. Number of pets have in total                                              | {1, 1}...   |
| OM#A | Numeric | B1. Number of pets - Bird                                                      | {1, 1}...   |
| OM#B | Numeric | B1. Number of pets - Cat                                                       | {1, 1}...   |
| OM#C | Numeric | B1. Number of pets - Dog                                                       | {1, 1}...   |
| OM#D | Numeric | B1. Number of pets - Fish                                                      | {1, 1}...   |
| OM#E | Numeric | B1. Number of pets - Pony/ Horse                                               | {1, 1}...   |
| OM#F | Numeric | B1. Number of pets - Rabbit                                                    | {1, 1}...   |
| ON#A | Numeric | B2. Main carer for the pet(s) in home - Bird                                   | {1, Yes}... |
| ON#B | Numeric | B2. Main carer for the pet(s) in home - Cat                                    | {1, Yes}... |
| ON#C | Numeric | B2. Main carer for the pet(s) in home - Dog                                    | {1, Yes}... |
| ON#D | Numeric | B2. Main carer for the pet(s) in home - Fish                                   | {1, Yes}... |
| ON#E | Numeric | B2. Main carer for the pet(s) in home - Pony/ Horse                            | {1, Yes}... |
| ON#F | Numeric | B2. Main carer for the pet(s) in home - Rabbit                                 | {1, Yes}... |
| OS#A | Numeric | B3. Where got pet(s) - Bird - Pet shop                                         | {0, NO}...  |
| OS#B | Numeric | B3. Where got pet(s) - Bird - Breeder                                          | {0, NO}...  |
| OS#C | Numeric | B3. Where got pet(s) - Bird - SPCA/Animal shelter                              | {0, NO}...  |
| OS#D | Numeric | B3. Where got pet(s) - Bird - Family member                                    | {0, NO}...  |
| OS#E | Numeric | B3. Where got pet(s) - Bird - Neighbour                                        | {0, NO}...  |
| OS#F | Numeric | B3. Where got pet(s) - Bird - Friend                                           | {0, NO}...  |
| OS#G | Numeric | B3. Where got pet(s) - Bird - Found/ Stray                                     | {0, NO}...  |
| OS#H | Numeric | B3. Where got pet(s) - Bird - Vet                                              | {0, NO}...  |
| OS#I | Numeric | B3. Where got pet(s) - Bird - Hobbyist/ Enthusiast                             | {0, NO}...  |
| OS#J | Numeric | B3. Where got pet(s) - Bird - Other                                            | {0, NO}...  |
| OS#K | Numeric | B3. Where got pet(s) - Fish - Pet shop                                         | {0, NO}...  |
| OS#L | Numeric | B3. Where got pet(s) - Fish - Breeder                                          | {0, NO}...  |
| OS#M | Numeric | B3. Where got pet(s) - Fish - SPCA/Animal shelter                              | {0, NO}...  |
| OS#N | Numeric | B3. Where got pet(s) - Fish - Family member                                    | {0, NO}...  |
| OS#O | Numeric | B3. Where got pet(s) - Fish - Neighbour                                        | {0, NO}...  |
| OS#P | Numeric | B3. Where got pet(s) - Fish - Friend                                           | {0, NO}...  |
| OS#Q | Numeric | B3. Where got pet(s) - Fish - Found/ Stray                                     | {0, NO}...  |
| OS#R | Numeric | B3. Where got pet(s) - Fish - Vet                                              | {0, NO}...  |
| OS#S | Numeric | B3. Where got pet(s) - Fish - Hobbyist/ Enthusiast                             | {0, NO}...  |
| OS#T | Numeric | B3. Where got pet(s) - Fish - Other                                            | {0, NO}...  |
| OS#U | Numeric | B3. Where got pet(s) - Pony/ Horse - Pet shop                                  | {0, NO}...  |

|       |         |                                                           |                       |
|-------|---------|-----------------------------------------------------------|-----------------------|
| OS#V  | Numeric | B3. Where got pet(s) - Pony/ Horse - Breeder              | {0, NO}...            |
| OS#W  | Numeric | B3. Where got pet(s) - Pony/ Horse - SPCA/Animal shelter  | {0, NO}...            |
| OS#X  | Numeric | B3. Where got pet(s) - Pony/ Horse - Family member        | {0, NO}...            |
| OS#Y  | Numeric | B3. Where got pet(s) - Pony/ Horse - Neighbour            | {0, NO}...            |
| OS#Z  | Numeric | B3. Where got pet(s) - Pony/ Horse - Friend               | {0, NO}...            |
| OS#AA | Numeric | B3. Where got pet(s) - Pony/ Horse - Found/ Stray         | {0, NO}...            |
| OS#AB | Numeric | B3. Where got pet(s) - Pony/ Horse - Vet                  | {0, NO}...            |
| OS#AC | Numeric | B3. Where got pet(s) - Pony/ Horse - Hobbyist/ Enthusiast | {0, NO}...            |
| OS#AD | Numeric | B3. Where got pet(s) - Pony/ Horse - Other                | {0, NO}...            |
| OS#AE | Numeric | B3. Where got pet(s) - Rabbit - Pet shop                  | {0, NO}...            |
| OS#AF | Numeric | B3. Where got pet(s) - Rabbit - Breeder                   | {0, NO}...            |
| OS#AG | Numeric | B3. Where got pet(s) - Rabbit - SPCA/Animal shelter       | {0, NO}...            |
| OS#AH | Numeric | B3. Where got pet(s) - Rabbit - Family member             | {0, NO}...            |
| OS#AI | Numeric | B3. Where got pet(s) - Rabbit - Neighbour                 | {0, NO}...            |
| OS#AJ | Numeric | B3. Where got pet(s) - Rabbit - Friend                    | {0, NO}...            |
| OS#AK | Numeric | B3. Where got pet(s) - Rabbit - Found/ Stray              | {0, NO}...            |
| OS#AL | Numeric | B3. Where got pet(s) - Rabbit - Vet                       | {0, NO}...            |
| OS#AM | Numeric | B3. Where got pet(s) - Rabbit - Hobbyist/ Enthusiast      | {0, NO}...            |
| OS#AN | Numeric | B3. Where got pet(s) - Rabbit - Other                     | {0, NO}...            |
| AR#   | String  | OB3a. Where else got bird(s)                              | None                  |
| AS#   | String  | OB3b. Where else got fish                                 | None                  |
| AT#   | String  | OB3c. Where else got pony/horse(s)                        | None                  |
| AU#   | String  | OB3d. Where else got rabbit(s)                            | None                  |
| OO#A  | Numeric | B4. Main reason decided to get pet(s) - Bird              | {1, Companionship}... |
| OO#B  | Numeric | B4. Main reason decided to get pet(s) - Cat               | {1, Companionship}... |
| OO#C  | Numeric | B4. Main reason decided to get pet(s) - Dog               | {1, Companionship}... |
| OO#D  | Numeric | B4. Main reason decided to get pet(s) - Fish              | {1, Companionship}... |
| OO#E  | Numeric | B4. Main reason decided to get pet(s) - Pony/ Horse       | {1, Companionship}... |
| OO#F  | Numeric | B4. Main reason decided to get pet(s) - Rabbit            | {1, Companionship}... |
| BB#   | String  | OB4a. Other reason decided to get a bird                  | None                  |
| BC#   | String  | OB4b. Other reason decided to get a cat                   | None                  |
| BD#   | String  | OB4c. Other reason decided to get a dog                   | None                  |
| BE#   | String  | OB4d. Other reason decided to get a fish                  | None                  |
| BF#   | String  | OB4e. Other reason decided to get a pony/horse            | None                  |
| BG#   | String  | OB4f. Other reason decided to get a rabbit                | None                  |

|      |         |                                                                                                           |                              |
|------|---------|-----------------------------------------------------------------------------------------------------------|------------------------------|
| OP#A | Numeric | B5. Role pet(s) plays in household - Bird                                                                 | {1, Member of the family}... |
| OP#B | Numeric | B5. Role pet(s) plays in household - Cat                                                                  | {1, Member of the family}... |
| OP#C | Numeric | B5. Role pet(s) plays in household - Dog                                                                  | {1, Member of the family}... |
| OP#D | Numeric | B5. Role pet(s) plays in household - Fish                                                                 | {1, Member of the family}... |
| OP#E | Numeric | B5. Role pet(s) plays in household - Pony/ Horse                                                          | {1, Member of the family}... |
| OP#F | Numeric | B5. Role pet(s) plays in household - Rabbit                                                               | {1, Member of the family}... |
| BN#  | String  | OB5a. Other role bird plays in household                                                                  | None                         |
| BO#  | String  | OB5b. Other role cat plays in household                                                                   | None                         |
| BP#  | String  | OB5c. Other role dog plays in household                                                                   | None                         |
| BQ#  | String  | OB5d. Other role fish plays in household                                                                  | None                         |
| BR#  | String  | OB5e. Other role pony/horse plays in household                                                            | None                         |
| BS#  | String  | OB5f. Other role rabbit plays in household                                                                | None                         |
| OQ#A | Numeric | B6. Number of times pet(s) seen by a vet in the past year - Bird                                          | {1, None}...                 |
| OQ#B | Numeric | B6. Number of times pet(s) seen by a vet in the past year - Cat                                           | {1, None}...                 |
| OQ#C | Numeric | B6. Number of times pet(s) seen by a vet in the past year - Dog                                           | {1, None}...                 |
| OQ#D | Numeric | B6. Number of times pet(s) seen by a vet in the past year - Fish                                          | {1, None}...                 |
| OQ#E | Numeric | B6. Number of times pet(s) seen by a vet in the past year - Pony/ Horse                                   | {1, None}...                 |
| OQ#F | Numeric | B6. Number of times pet(s) seen by a vet in the past year - Rabbit                                        | {1, None}...                 |
| OU#A | Numeric | B7. Reasons pet(s) taken to the vet in the past year - Bird - Vaccinations/Annual check-up                | {0, NO}...                   |
| OU#B | Numeric | B7. Reasons pet(s) taken to the vet in the past year - Bird - Specific health issue/Needed to consult vet | {0, NO}...                   |
| OU#C | Numeric | B7. Reasons pet(s) taken to the vet in the past year - Bird - De-sexing                                   | {0, NO}...                   |
| OU#D | Numeric | B7. Reasons pet(s) taken to the vet in the past year - Bird - Microchipping                               | {0, NO}...                   |
| OU#E | Numeric | B7. Reasons pet(s) taken to the vet in the past year - Bird - Emergency/ Accident                         | {0, NO}...                   |
| OU#F | Numeric | B7. Reasons pet(s) taken to the vet in the past year - Bird - Some other reason                           | {0, NO}...                   |
| OU#G | Numeric | B7. Reasons pet(s) taken to the vet in the past year - Cat - Vaccinations/Annual check-up                 | {0, NO}...                   |
| OU#H | Numeric | B7. Reasons pet(s) taken to the vet in the past year - Cat - Specific health issue/Needed to consult vet  | {0, NO}...                   |
| OU#I | Numeric | B7. Reasons pet(s) taken to the vet in the past year - Cat - De-sexing                                    | {0, NO}...                   |
| OU#J | Numeric | B7. Reasons pet(s) taken to the vet in the past year - Cat - Microchipping                                | {0, NO}...                   |

|       |         |                                                                                                                  |            |
|-------|---------|------------------------------------------------------------------------------------------------------------------|------------|
| OU#K  | Numeric | B7. Reasons pet(s) taken to the vet in the past year - Cat - Emergency/ Accident                                 | {0, NO}... |
| OU#L  | Numeric | B7. Reasons pet(s) taken to the vet in the past year - Cat - Some other reason                                   | {0, NO}... |
| OU#M  | Numeric | B7. Reasons pet(s) taken to the vet in the past year - Dog - Vaccinations/Annual check-up                        | {0, NO}... |
| OU#N  | Numeric | B7. Reasons pet(s) taken to the vet in the past year - Dog - Specific health issue/Needed to consult vet         | {0, NO}... |
| OU#O  | Numeric | B7. Reasons pet(s) taken to the vet in the past year - Dog - De-sexing                                           | {0, NO}... |
| OU#P  | Numeric | B7. Reasons pet(s) taken to the vet in the past year - Dog - Microchipping                                       | {0, NO}... |
| OU#Q  | Numeric | B7. Reasons pet(s) taken to the vet in the past year - Dog - Emergency/ Accident                                 | {0, NO}... |
| OU#R  | Numeric | B7. Reasons pet(s) taken to the vet in the past year - Dog - Some other reason                                   | {0, NO}... |
| OU#S  | Numeric | B7. Reasons pet(s) taken to the vet in the past year - Fish - Vaccinations/Annual check-up                       | {0, NO}... |
| OU#T  | Numeric | B7. Reasons pet(s) taken to the vet in the past year - Fish - Specific health issue/Needed to consult vet        | {0, NO}... |
| OU#U  | Numeric | B7. Reasons pet(s) taken to the vet in the past year - Fish - De-sexing                                          | {0, NO}... |
| OU#V  | Numeric | B7. Reasons pet(s) taken to the vet in the past year - Fish - Microchipping                                      | {0, NO}... |
| OU#W  | Numeric | B7. Reasons pet(s) taken to the vet in the past year - Fish - Emergency/ Accident                                | {0, NO}... |
| OU#X  | Numeric | B7. Reasons pet(s) taken to the vet in the past year - Fish - Some other reason                                  | {0, NO}... |
| OU#Y  | Numeric | B7. Reasons pet(s) taken to the vet in the past year - Pony/ Horse - Vaccinations/Annual check-up                | {0, NO}... |
| OU#Z  | Numeric | B7. Reasons pet(s) taken to the vet in the past year - Pony/ Horse - Specific health issue/Needed to consult vet | {0, NO}... |
| OU#AA | Numeric | B7. Reasons pet(s) taken to the vet in the past year - Pony/ Horse - De-sexing                                   | {0, NO}... |
| OU#AB | Numeric | B7. Reasons pet(s) taken to the vet in the past year - Pony/ Horse - Microchipping                               | {0, NO}... |
| OU#AC | Numeric | B7. Reasons pet(s) taken to the vet in the past year - Pony/ Horse - Emergency/ Accident                         | {0, NO}... |
| OU#AD | Numeric | B7. Reasons pet(s) taken to the vet in the past year - Pony/ Horse - Some other reason                           | {0, NO}... |

|       |         |                                                                                                                                 |            |
|-------|---------|---------------------------------------------------------------------------------------------------------------------------------|------------|
| OU#AE | Numeric | B7. Reasons pet(s) taken to the vet in the past year - Rabbit - Vaccinations/Annual check-up                                    | {0, NO}... |
| OU#AF | Numeric | B7. Reasons pet(s) taken to the vet in the past year - Rabbit - Specific health issue/Needed to consult vet                     | {0, NO}... |
| OU#AG | Numeric | B7. Reasons pet(s) taken to the vet in the past year - Rabbit - De-sexing                                                       | {0, NO}... |
| OU#AH | Numeric | B7. Reasons pet(s) taken to the vet in the past year - Rabbit - Microchipping                                                   | {0, NO}... |
| OU#AI | Numeric | B7. Reasons pet(s) taken to the vet in the past year - Rabbit - Emergency/ Accident                                             | {0, NO}... |
| OU#AJ | Numeric | B7. Reasons pet(s) taken to the vet in the past year - Rabbit - Some other reason                                               | {0, NO}... |
| CF#   | String  | OB7a. Other reason bird taken to vet                                                                                            | None       |
| CG#   | String  | OB7b. Other reason cat taken to vet                                                                                             | None       |
| CH#   | String  | OB7c. Other reason dog taken to vet                                                                                             | None       |
| CI#   | String  | OB7d. Other reason fish taken to vet                                                                                            | None       |
| CJ#   | String  | OB7e. Other reason pony/horse taken to vet                                                                                      | None       |
| CK#   | String  | OB7f. Other reason rabbit taken to vet                                                                                          | None       |
| OW#A  | Numeric | B8. Reasons not taken pet(s) to the vet in the past year - Bird - Wasnt sick/not necessary                                      | {0, NO}... |
| OW#B  | Numeric | B8. Reasons not taken pet(s) to the vet in the past year - Bird - Cost/ Too expensive                                           | {0, NO}... |
| OW#C  | Numeric | B8. Reasons not taken pet(s) to the vet in the past year - Bird - Isnt a vet near where I live                                  | {0, NO}... |
| OW#D  | Numeric | B8. Reasons not taken pet(s) to the vet in the past year - Bird - Accessibility/ its difficult for me to take my pet to the vet | {0, NO}... |
| OW#E  | Numeric | B8. Reasons not taken pet(s) to the vet in the past year - Bird - Some other reason                                             | {0, NO}... |
| OW#F  | Numeric | B8. Reasons not taken pet(s) to the vet in the past year - Cat - Wasnt sick/not necessary                                       | {0, NO}... |
| OW#G  | Numeric | B8. Reasons not taken pet(s) to the vet in the past year - Cat - Cost/ Too expensive                                            | {0, NO}... |
| OW#H  | Numeric | B8. Reasons not taken pet(s) to the vet in the past year - Cat - Isnt a vet near where I live                                   | {0, NO}... |
| OW#I  | Numeric | B8. Reasons not taken pet(s) to the vet in the past year - Cat - Accessibility/ its difficult for me to take my pet to the vet  | {0, NO}... |
| OW#J  | Numeric | B8. Reasons not taken pet(s) to the vet in the past year - Cat - Some other reason                                              | {0, NO}... |
| OW#K  | Numeric | B8. Reasons not taken pet(s) to the vet in the past year - Dog - Wasnt sick/not necessary                                       | {0, NO}... |

|       |         |                                                                                                                                        |            |
|-------|---------|----------------------------------------------------------------------------------------------------------------------------------------|------------|
| OW#L  | Numeric | B8. Reasons not taken pet(s) to the vet in the past year - Dog - Cost/ Too expensive                                                   | {0, NO}... |
| OW#M  | Numeric | B8. Reasons not taken pet(s) to the vet in the past year - Dog - Isnt a vet near where I live                                          | {0, NO}... |
| OW#N  | Numeric | B8. Reasons not taken pet(s) to the vet in the past year - Dog - Accessibility/ its difficult for me to take my pet to the vet         | {0, NO}... |
| OW#O  | Numeric | B8. Reasons not taken pet(s) to the vet in the past year - Dog - Some other reason                                                     | {0, NO}... |
| OW#P  | Numeric | B8. Reasons not taken pet(s) to the vet in the past year - Fish - Wasnt sick/not necessary                                             | {0, NO}... |
| OW#Q  | Numeric | B8. Reasons not taken pet(s) to the vet in the past year - Fish - Cost/ Too expensive                                                  | {0, NO}... |
| OW#R  | Numeric | B8. Reasons not taken pet(s) to the vet in the past year - Fish - Isnt a vet near where I live                                         | {0, NO}... |
| OW#S  | Numeric | B8. Reasons not taken pet(s) to the vet in the past year - Fish - Accessibility/ its difficult for me to take my pet to the vet        | {0, NO}... |
| OW#T  | Numeric | B8. Reasons not taken pet(s) to the vet in the past year - Fish - Some other reason                                                    | {0, NO}... |
| OW#U  | Numeric | B8. Reasons not taken pet(s) to the vet in the past year - Pony/ Horse - Wasnt sick/not necessary                                      | {0, NO}... |
| OW#V  | Numeric | B8. Reasons not taken pet(s) to the vet in the past year - Pony/ Horse - Cost/ Too expensive                                           | {0, NO}... |
| OW#W  | Numeric | B8. Reasons not taken pet(s) to the vet in the past year - Pony/ Horse - Isnt a vet near where I live                                  | {0, NO}... |
| OW#X  | Numeric | B8. Reasons not taken pet(s) to the vet in the past year - Pony/ Horse - Accessibility/ its difficult for me to take my pet to the vet | {0, NO}... |
| OW#Y  | Numeric | B8. Reasons not taken pet(s) to the vet in the past year - Pony/ Horse - Some other reason                                             | {0, NO}... |
| OW#Z  | Numeric | B8. Reasons not taken pet(s) to the vet in the past year - Rabbit - Wasnt sick/not necessary                                           | {0, NO}... |
| OW#AA | Numeric | B8. Reasons not taken pet(s) to the vet in the past year - Rabbit - Cost/ Too expensive                                                | {0, NO}... |
| OW#AB | Numeric | B8. Reasons not taken pet(s) to the vet in the past year - Rabbit - Isnt a vet near where I live                                       | {0, NO}... |

|       |         |                                                                                                                                   |                                                          |
|-------|---------|-----------------------------------------------------------------------------------------------------------------------------------|----------------------------------------------------------|
| OW#AC | Numeric | B8. Reasons not taken pet(s) to the vet in the past year - Rabbit - Accessibility/ its difficult for me to take my pet to the vet | {0, NO}...                                               |
| OW#AD | Numeric | B8. Reasons not taken pet(s) to the vet in the past year - Rabbit - Some other reason                                             | {0, NO}...                                               |
| CR#   | String  | OB8a. Other reason bird not taken to vet                                                                                          | None                                                     |
| CS#   | String  | OB8b. Other reason cat not taken to vet                                                                                           | None                                                     |
| CT#   | String  | OB8c. Other reason dog not taken to vet                                                                                           | None                                                     |
| CU#   | String  | OB8d. Other reason fish not taken to vet                                                                                          | None                                                     |
| CV#   | String  | OB8e. Other reason pony/horse not taken to vet                                                                                    | None                                                     |
| CW#   | String  | OB8f. Other reason rabbit not taken to vet                                                                                        | None                                                     |
| PN#A  | Numeric | C1. Type of cat - 1                                                                                                               | {1, Registered Pedigree}...                              |
| PN#B  | Numeric | C1. Type of cat - 2                                                                                                               | {1, Registered Pedigree}...                              |
| PN#C  | Numeric | C1. Type of cat - 3                                                                                                               | {1, Registered Pedigree}...                              |
| PN#D  | Numeric | C1. Type of cat - 4                                                                                                               | {1, Registered Pedigree}...                              |
| PN#E  | Numeric | C1. Type of cat - 5                                                                                                               | {1, Registered Pedigree}...                              |
| PN#F  | Numeric | C1. Type of cat - 6                                                                                                               | {1, Registered Pedigree}...                              |
| PO#A  | Numeric | C2. Where got cat - 1                                                                                                             | {1, Pet shop}...                                         |
| PO#B  | Numeric | C2. Where got cat - 2                                                                                                             | {1, Pet shop}...                                         |
| PO#C  | Numeric | C2. Where got cat - 3                                                                                                             | {1, Pet shop}...                                         |
| PO#D  | Numeric | C2. Where got cat - 4                                                                                                             | {1, Pet shop}...                                         |
| PO#E  | Numeric | C2. Where got cat - 5                                                                                                             | {1, Pet shop}...                                         |
| PO#F  | Numeric | C2. Where got cat - 6                                                                                                             | {1, Pet shop}...                                         |
| DP#   | String  | OC2a. Where else got Cat1                                                                                                         | None                                                     |
| DQ#   | String  | OC2b. Where else got Cat2                                                                                                         | None                                                     |
| DR#   | String  | OC2c. Where else got Cat3                                                                                                         | None                                                     |
| DS#   | String  | OC2d. Where else got Cat4                                                                                                         | None                                                     |
| DT#   | String  | OC2e. Where else got Cat5                                                                                                         | None                                                     |
| DU#   | String  | OC2f. Where else got Cat6                                                                                                         | None                                                     |
| PP#A  | Numeric | C3. Cat is an indoor cat, outdoor cat or both - 1                                                                                 | {1, Indoor cat only}...                                  |
| PP#B  | Numeric | C3. Cat is an indoor cat, outdoor cat or both - 2                                                                                 | {1, Indoor cat only}...                                  |
| PP#C  | Numeric | C3. Cat is an indoor cat, outdoor cat or both - 3                                                                                 | {1, Indoor cat only}...                                  |
| PP#D  | Numeric | C3. Cat is an indoor cat, outdoor cat or both - 4                                                                                 | {1, Indoor cat only}...                                  |
| PP#E  | Numeric | C3. Cat is an indoor cat, outdoor cat or both - 5                                                                                 | {1, Indoor cat only}...                                  |
| PP#F  | Numeric | C3. Cat is an indoor cat, outdoor cat or both - 6                                                                                 | {1, Indoor cat only}...                                  |
| PQ#A  | Numeric | C4. Cat wears a collar - 1                                                                                                        | {1, Yes - with a bell or other anti-predation device}... |
| PQ#B  | Numeric | C4. Cat wears a collar - 2                                                                                                        | {1, Yes - with a bell or other anti-predation device}... |
| PQ#C  | Numeric | C4. Cat wears a collar - 3                                                                                                        | {1, Yes - with a bell or other anti-predation device}... |
| PQ#D  | Numeric | C4. Cat wears a collar - 4                                                                                                        | {1, Yes - with a bell or other anti-predation device}... |

|      |         |                                                                                                                    |                                                          |
|------|---------|--------------------------------------------------------------------------------------------------------------------|----------------------------------------------------------|
| PQ#E | Numeric | C4. Cat wears a collar - 5                                                                                         | {1, Yes - with a bell or other anti-predation device}... |
| PQ#F | Numeric | C4. Cat wears a collar - 6                                                                                         | {1, Yes - with a bell or other anti-predation device}... |
| PR#A | Numeric | C5. Cat has been de-sexed - 1                                                                                      | {1, Yes}...                                              |
| PR#B | Numeric | C5. Cat has been de-sexed - 2                                                                                      | {1, Yes}...                                              |
| PR#C | Numeric | C5. Cat has been de-sexed - 3                                                                                      | {1, Yes}...                                              |
| PR#D | Numeric | C5. Cat has been de-sexed - 4                                                                                      | {1, Yes}...                                              |
| PR#E | Numeric | C5. Cat has been de-sexed - 5                                                                                      | {1, Yes}...                                              |
| PR#F | Numeric | C5. Cat has been de-sexed - 6                                                                                      | {1, Yes}...                                              |
| PS#A | Numeric | C6. Cat has been microchipped - 1                                                                                  | {1, Yes}...                                              |
| PS#B | Numeric | C6. Cat has been microchipped - 2                                                                                  | {1, Yes}...                                              |
| PS#C | Numeric | C6. Cat has been microchipped - 3                                                                                  | {1, Yes}...                                              |
| PS#D | Numeric | C6. Cat has been microchipped - 4                                                                                  | {1, Yes}...                                              |
| PS#E | Numeric | C6. Cat has been microchipped - 5                                                                                  | {1, Yes}...                                              |
| PS#F | Numeric | C6. Cat has been microchipped - 6                                                                                  | {1, Yes}...                                              |
| PU#A | Numeric | C7. Cat microchip registered on the New Zealand Companion Animal Register - 1                                      | {1, Yes}...                                              |
| PU#B | Numeric | C7. Cat microchip registered on the New Zealand Companion Animal Register - 2                                      | {1, Yes}...                                              |
| PU#C | Numeric | C7. Cat microchip registered on the New Zealand Companion Animal Register - 3                                      | {1, Yes}...                                              |
| PU#D | Numeric | C7. Cat microchip registered on the New Zealand Companion Animal Register - 4                                      | {1, Yes}...                                              |
| PU#E | Numeric | C7. Cat microchip registered on the New Zealand Companion Animal Register - 5                                      | {1, Yes}...                                              |
| PU#F | Numeric | C7. Cat microchip registered on the New Zealand Companion Animal Register - 6                                      | {1, Yes}...                                              |
| EZ#A | Numeric | C8. Reasons cat(s) has not been de-sexed - Cost                                                                    | {0, NO}...                                               |
| EZ#B | Numeric | C8. Reasons cat(s) has not been de-sexed - Kept for breeding                                                       | {0, NO}...                                               |
| EZ#C | Numeric | C8. Reasons cat(s) has not been de-sexed - Concerned about the process                                             | {0, NO}...                                               |
| EZ#D | Numeric | C8. Reasons cat(s) has not been de-sexed - Feel its unnecessary/ Dont think its important                          | {0, NO}...                                               |
| EZ#E | Numeric | C8. Reasons cat(s) has not been de-sexed - Think its important for an animal to have offspring/at least one litter | {0, NO}...                                               |
| EZ#F | Numeric | C8. Reasons cat(s) has not been de-sexed - It wasnt de-sexed when we acquired and its too old now                  | {0, NO}...                                               |
| EZ#G | Numeric | C8. Reasons cat(s) has not been de-sexed - Some other reason                                                       | {0, NO}...                                               |
| EZ#H | Numeric | C8. Reasons cat(s) has not been de-sexed - Too young                                                               | {0, NO}...                                               |
| FA#  | String  | OC8. Other reasons cat(s) has not been de-sexed                                                                    | None                                                     |

|      |         |                                                                                                    |            |
|------|---------|----------------------------------------------------------------------------------------------------|------------|
| FB#A | Numeric | C9. Reasons cat(s) has not been microchipped - Cost                                                | {0, NO}... |
| FB#B | Numeric | C9. Reasons cat(s) has not been microchipped - Feel its unnecessary/ Dont think its important      | {0, NO}... |
| FB#C | Numeric | C9. Reasons cat(s) has not been microchipped - Havent got around to it                             | {0, NO}... |
| FB#D | Numeric | C9. Reasons cat(s) has not been microchipped - Concerned about the process                         | {0, NO}... |
| FB#E | Numeric | C9. Reasons cat(s) has not been microchipped - Some other reason                                   | {0, NO}... |
| FC#  | String  | OC9. Other reasons cat(s) has not been microchipped                                                | None       |
| FD#A | Numeric | C10. Food fed to cat(s) in the past month - Commercial dry cat food (kibble, biscuits in bag/ box) | {0, NO}... |
| FD#B | Numeric | C10. Food fed to cat(s) in the past month - Commercial wet cat food (cans, trays, tubs)            | {0, NO}... |
| FD#C | Numeric | C10. Food fed to cat(s) in the past month - Commercial chilled cat food (rolls/ packets)           | {0, NO}... |
| FD#D | Numeric | C10. Food fed to cat(s) in the past month - Fresh/ Raw meat or chicken                             | {0, NO}... |
| FD#E | Numeric | C10. Food fed to cat(s) in the past month - Table scraps/ leftover human food                      | {0, NO}... |
| FD#F | Numeric | C10. Food fed to cat(s) in the past month - Homemade food made specifically for the cat            | {0, NO}... |
| FD#G | Numeric | C10. Food fed to cat(s) in the past month - None of the above                                      | {0, NO}... |
| FE#A | Numeric | C11. Where buy dry cat food - Supermarket                                                          | {0, NO}... |
| FE#B | Numeric | C11. Where buy dry cat food - Variety store (eg Kmart, The Warehouse)                              | {0, NO}... |
| FE#C | Numeric | C11. Where buy dry cat food - Rural Merchandiser (eg PGG, CRT, RD1 etc)                            | {0, NO}... |
| FE#D | Numeric | C11. Where buy dry cat food - Pet store                                                            | {0, NO}... |
| FE#E | Numeric | C11. Where buy dry cat food - Veterinarian                                                         | {0, NO}... |
| FE#F | Numeric | C11. Where buy dry cat food - Internet/ Online                                                     | {0, NO}... |
| FE#G | Numeric | C11. Where buy dry cat food - Someplace else                                                       | {0, NO}... |
| FE#H | Numeric | C11. Where buy dry cat food - None/ Dont know                                                      | {0, NO}... |
| FF#  | String  | OC11. Other place where buy dry cat food                                                           | None       |
| FG#A | Numeric | C12. Where buy wet cat food - Supermarket                                                          | {0, NO}... |
| FG#B | Numeric | C12. Where buy wet cat food - Variety store (eg Kmart, The Warehouse)                              | {0, NO}... |

|      |         |                                                                         |                             |
|------|---------|-------------------------------------------------------------------------|-----------------------------|
| FG#C | Numeric | C12. Where buy wet cat food - Rural Merchandiser (eg PGG, CRT, RD1 etc) | {0, NO}...                  |
| FG#D | Numeric | C12. Where buy wet cat food - Pet store                                 | {0, NO}...                  |
| FG#E | Numeric | C12. Where buy wet cat food - Veterinarian                              | {0, NO}...                  |
| FG#F | Numeric | C12. Where buy wet cat food - Internet/ Online                          | {0, NO}...                  |
| FG#G | Numeric | C12. Where buy wet cat food - Someplace else                            | {0, NO}...                  |
| FG#H | Numeric | C12. Where buy wet cat food - None/ Dont know                           | {0, NO}...                  |
| FH#  | String  | OC12. Other place where buy wet cat food                                | None                        |
| PW#A | Numeric | D1. Type of dog - 1                                                     | {1, Registered Pedigree}... |
| PW#B | Numeric | D1. Type of dog - 2                                                     | {1, Registered Pedigree}... |
| PW#C | Numeric | D1. Type of dog - 3                                                     | {1, Registered Pedigree}... |
| PW#D | Numeric | D1. Type of dog - 4                                                     | {1, Registered Pedigree}... |
| PW#E | Numeric | D1. Type of dog - 5                                                     | {1, Registered Pedigree}... |
| PW#F | Numeric | D1. Type of dog - 6                                                     | {1, Registered Pedigree}... |
| PX#A | Numeric | D2. Where got dog - 1                                                   | {1, Pet shop}...            |
| PX#B | Numeric | D2. Where got dog - 2                                                   | {1, Pet shop}...            |
| PX#C | Numeric | D2. Where got dog - 3                                                   | {1, Pet shop}...            |
| PX#D | Numeric | D2. Where got dog - 4                                                   | {1, Pet shop}...            |
| PX#E | Numeric | D2. Where got dog - 5                                                   | {1, Pet shop}...            |
| PX#F | Numeric | D2. Where got dog - 6                                                   | {1, Pet shop}...            |
| GA#  | String  | OD2a. Where else got dog1                                               | None                        |
| GB#  | String  | OD2b. Where else got dog2                                               | None                        |
| GC#  | String  | OD2c. Where else got dog3                                               | None                        |
| GD#  | String  | OD2d. Where else got dog4                                               | None                        |
| GE#  | String  | OD2e. Where else got dog5                                               | None                        |
| GF#  | String  | OD2f. Where else got dog6                                               | None                        |
| PY#A | Numeric | D3. Dog is an indoor dog, outdoor dog or both - 1                       | {1, Indoor dog only}...     |
| PY#B | Numeric | D3. Dog is an indoor dog, outdoor dog or both - 2                       | {1, Indoor dog only}...     |
| PY#C | Numeric | D3. Dog is an indoor dog, outdoor dog or both - 3                       | {1, Indoor dog only}...     |
| PY#D | Numeric | D3. Dog is an indoor dog, outdoor dog or both - 4                       | {1, Indoor dog only}...     |
| PY#E | Numeric | D3. Dog is an indoor dog, outdoor dog or both - 5                       | {1, Indoor dog only}...     |
| PY#F | Numeric | D3. Dog is an indoor dog, outdoor dog or both - 6                       | {1, Indoor dog only}...     |
| PZ#A | Numeric | D4. Dog has been de-sexed - 1                                           | {1, Yes}...                 |
| PZ#B | Numeric | D4. Dog has been de-sexed - 2                                           | {1, Yes}...                 |
| PZ#C | Numeric | D4. Dog has been de-sexed - 3                                           | {1, Yes}...                 |
| PZ#D | Numeric | D4. Dog has been de-sexed - 4                                           | {1, Yes}...                 |
| PZ#E | Numeric | D4. Dog has been de-sexed - 5                                           | {1, Yes}...                 |
| PZ#F | Numeric | D4. Dog has been de-sexed - 6                                           | {1, Yes}...                 |
| QA#A | Numeric | D5. Dog has been microchipped - 1                                       | {1, Yes}...                 |
| QA#B | Numeric | D5. Dog has been microchipped - 2                                       | {1, Yes}...                 |

|      |         |                                                                                                                    |             |
|------|---------|--------------------------------------------------------------------------------------------------------------------|-------------|
| QA#C | Numeric | D5. Dog has been microchipped - 3                                                                                  | {1, Yes}... |
| QA#D | Numeric | D5. Dog has been microchipped - 4                                                                                  | {1, Yes}... |
| QA#E | Numeric | D5. Dog has been microchipped - 5                                                                                  | {1, Yes}... |
| QA#F | Numeric | D5. Dog has been microchipped - 6                                                                                  | {1, Yes}... |
| QD#A | Numeric | D6. Dog microchip registered on the New Zealand Companion Animal Register - 1                                      | {1, Yes}... |
| QD#B | Numeric | D6. Dog microchip registered on the New Zealand Companion Animal Register - 2                                      | {1, Yes}... |
| QD#C | Numeric | D6. Dog microchip registered on the New Zealand Companion Animal Register - 3                                      | {1, Yes}... |
| QD#D | Numeric | D6. Dog microchip registered on the New Zealand Companion Animal Register - 4                                      | {1, Yes}... |
| QD#E | Numeric | D6. Dog microchip registered on the New Zealand Companion Animal Register - 5                                      | {1, Yes}... |
| QD#F | Numeric | D6. Dog microchip registered on the New Zealand Companion Animal Register - 6                                      | {1, Yes}... |
| QB#A | Numeric | D7. Dog registered with the local council - 1                                                                      | {1, Yes}... |
| QB#B | Numeric | D7. Dog registered with the local council - 2                                                                      | {1, Yes}... |
| QB#C | Numeric | D7. Dog registered with the local council - 3                                                                      | {1, Yes}... |
| QB#D | Numeric | D7. Dog registered with the local council - 4                                                                      | {1, Yes}... |
| QB#E | Numeric | D7. Dog registered with the local council - 5                                                                      | {1, Yes}... |
| QB#F | Numeric | D7. Dog registered with the local council - 6                                                                      | {1, Yes}... |
| HK#A | Numeric | D8. Reasons dog(s) has not been de-sexed - Cost                                                                    | {0, NO}...  |
| HK#B | Numeric | D8. Reasons dog(s) has not been de-sexed - Kept for breeding                                                       | {0, NO}...  |
| HK#C | Numeric | D8. Reasons dog(s) has not been de-sexed - Concerned about the process                                             | {0, NO}...  |
| HK#D | Numeric | D8. Reasons dog(s) has not been de-sexed - Feel its unnecessary/ Dont think its important                          | {0, NO}...  |
| HK#E | Numeric | D8. Reasons dog(s) has not been de-sexed - Think its important for an animal to have offspring/at least one litter | {0, NO}...  |
| HK#F | Numeric | D8. Reasons dog(s) has not been de-sexed - Some other reason                                                       | {0, NO}...  |
| HK#G | Numeric | D8. Reasons dog(s) has not been de-sexed - Too young                                                               | {0, NO}...  |
| HL#  | String  | OD8. Other reasons dog(s) has not been de-sexed                                                                    | None        |
| HM#A | Numeric | D9. Reasons dog(s) has not been microchipped - Cost                                                                | {0, NO}...  |

|      |         |                                                                                                                 |            |
|------|---------|-----------------------------------------------------------------------------------------------------------------|------------|
| HM#B | Numeric | D9. Reasons dog(s) has not been microchipped - Feel its unnecessary/ Dont think its important                   | {0, NO}... |
| HM#C | Numeric | D9. Reasons dog(s) has not been microchipped - Havent got around to it                                          | {0, NO}... |
| HM#D | Numeric | D9. Reasons dog(s) has not been microchipped - Concerned about the process                                      | {0, NO}... |
| HM#E | Numeric | D9. Reasons dog(s) has not been microchipped - Some other reason                                                | {0, NO}... |
| HN#  | String  | OD9. Other reasons dog(s) has not been microchipped                                                             | None       |
| HO#A | Numeric | D10. Reasons dog(s) has not been registered with local council - Cost                                           | {0, NO}... |
| HO#B | Numeric | D10. Reasons dog(s) has not been registered with local council - Feel its unnecessary/ Dont think its important | {0, NO}... |
| HO#C | Numeric | D10. Reasons dog(s) has not been registered with local council - Havent got around to it                        | {0, NO}... |
| HO#D | Numeric | D10. Reasons dog(s) has not been registered with local council - I didnt know I needed to do this               | {0, NO}... |
| HO#E | Numeric | D10. Reasons dog(s) has not been registered with local council - Some other reason                              | {0, NO}... |
| HP#  | String  | OD10. Other reasons dog(s) has not been registered with local council                                           | None       |
| HQ#A | Numeric | D11. Food fed to dog(s) in the past month - Commercial dry dog food (kibble, biscuits in bag/ box)              | {0, NO}... |
| HQ#B | Numeric | D11. Food fed to dog(s) in the past month - Commercial wet dog food (cans, trays, tubs)                         | {0, NO}... |
| HQ#C | Numeric | D11. Food fed to dog(s) in the past month - Commercial chilled dog food (rolls/ packets)                        | {0, NO}... |
| HQ#D | Numeric | D11. Food fed to dog(s) in the past month - Fresh/ Raw meat or chicken                                          | {0, NO}... |
| HQ#E | Numeric | D11. Food fed to dog(s) in the past month - Table scraps/ leftover human food                                   | {0, NO}... |
| HQ#F | Numeric | D11. Food fed to dog(s) in the past month - Homemade food made specifically for the dog                         | {0, NO}... |
| HQ#G | Numeric | D11. Food fed to dog(s) in the past month - None of the above                                                   | {0, NO}... |
| HR#A | Numeric | D12. Where buy dry dog food - Supermarket                                                                       | {0, NO}... |
| HR#B | Numeric | D12. Where buy dry dog food - Variety store (eg Kmart, The Warehouse)                                           | {0, NO}... |

|      |         |                                                                                                 |                 |
|------|---------|-------------------------------------------------------------------------------------------------|-----------------|
| HR#C | Numeric | D12. Where buy dry dog food - Rural Merchandiser (eg PGG, CRT, RD1 etc)                         | {0, NO}...      |
| HR#D | Numeric | D12. Where buy dry dog food - Pet store                                                         | {0, NO}...      |
| HR#E | Numeric | D12. Where buy dry dog food - Veterinarian                                                      | {0, NO}...      |
| HR#F | Numeric | D12. Where buy dry dog food - Internet/ Online                                                  | {0, NO}...      |
| HR#G | Numeric | D12. Where buy dry dog food - Someplace else                                                    | {0, NO}...      |
| HR#H | Numeric | D12. Where buy dry dog food - None/ Dont know                                                   | {0, NO}...      |
| HS#  | String  | OD12. Other place where buy dry dog food                                                        | None            |
| HT#A | Numeric | D13. Where buy wet dog food - Supermarket                                                       | {0, NO}...      |
| HT#B | Numeric | D13. Where buy wet dog food - Variety store (eg Kmart, The Warehouse)                           | {0, NO}...      |
| HT#C | Numeric | D13. Where buy wet dog food - Rural Merchandiser (eg PGG, CRT, RD1 etc)                         | {0, NO}...      |
| HT#D | Numeric | D13. Where buy wet dog food - Pet store                                                         | {0, NO}...      |
| HT#E | Numeric | D13. Where buy wet dog food - Veterinarian                                                      | {0, NO}...      |
| HT#F | Numeric | D13. Where buy wet dog food - Internet/ Online                                                  | {0, NO}...      |
| HT#G | Numeric | D13. Where buy wet dog food - Someplace else                                                    | {0, NO}...      |
| HT#H | Numeric | D13. Where buy wet dog food - None/ Dont know                                                   | {0, NO}...      |
| HU#  | String  | OD13. Other place where buy wet dog food                                                        | None            |
| OY#A | Numeric | E1C. Amount spent on items for cat(s) over past year - Food                                     | {1, Nothing}... |
| OY#B | Numeric | E1C. Amount spent on items for cat(s) over past year - Veterinary services                      | {1, Nothing}... |
| OY#C | Numeric | E1C. Amount spent on items for cat(s) over past year - Clipping/ Grooming                       | {1, Nothing}... |
| OY#D | Numeric | E1C. Amount spent on items for cat(s) over past year - Training                                 | {1, Nothing}... |
| OY#E | Numeric | E1C. Amount spent on items for cat(s) over past year - Clothing/ Leads Bowls/ Toys/ Accessories | {1, Nothing}... |
| OY#F | Numeric | E1C. Amount spent on items for cat(s) over past year - Boarding/ Day Care/ Minding/ Walking     | {1, Nothing}... |
| OY#G | Numeric | E1C. Amount spent on items for cat(s) over past year - Insurance                                | {1, Nothing}... |
| OY#H | Numeric | E1C. Amount spent on items for cat(s) over past year - Registration Membership                  | {1, Nothing}... |
| OY#I | Numeric | E1C. Amount spent on items for cat(s) over past year - Cat litter                               | {1, Nothing}... |

|      |         |                                                                                                     |                 |
|------|---------|-----------------------------------------------------------------------------------------------------|-----------------|
| OY#J | Numeric | E1C. Amount spent on items for cat(s) over past year - Healthcare products (eg vitamin supplements) | {1, Nothing}... |
| OY#K | Numeric | E1C. Amount spent on items for cat(s) over past year - Any other expenses                           | {1, Nothing}... |
| IG#A | Numeric | E2C. Reasons do not have insurance for cat(s) - Dont see the value                                  | {0, NO}...      |
| IG#B | Numeric | E2C. Reasons do not have insurance for cat(s) - Too expensive                                       | {0, NO}...      |
| IG#C | Numeric | E2C. Reasons do not have insurance for cat(s) - Dont know much about it/ not looked into it         | {0, NO}...      |
| IG#D | Numeric | E2C. Reasons do not have insurance for cat(s) - Didnt know it was available                         | {0, NO}...      |
| IG#E | Numeric | E2C. Reasons do not have insurance for cat(s) - Some other reason                                   | {0, NO}...      |
| IH#  | String  | OE2. Other reasons do not have insurance for cat(s)                                                 | None            |
| PA#A | Numeric | E1D. Amount spent on items for dog(s) over past year - Food                                         | {1, Nothing}... |
| PA#B | Numeric | E1D. Amount spent on items for dog(s) over past year - Veterinary services                          | {1, Nothing}... |
| PA#C | Numeric | E1D. Amount spent on items for dog(s) over past year - Clipping/ Grooming                           | {1, Nothing}... |
| PA#D | Numeric | E1D. Amount spent on items for dog(s) over past year - Training                                     | {1, Nothing}... |
| PA#E | Numeric | E1D. Amount spent on items for dog(s) over past year - Clothing/ Leads Bowls/ Toys/ Accessories     | {1, Nothing}... |
| PA#F | Numeric | E1D. Amount spent on items for dog(s) over past year - Boarding/ Day Care/ Minding/ Walking         | {1, Nothing}... |
| PA#G | Numeric | E1D. Amount spent on items for dog(s) over past year - Insurance                                    | {1, Nothing}... |
| PA#H | Numeric | E1D. Amount spent on items for dog(s) over past year - Registration Membership                      | {1, Nothing}... |
| PA#I | Numeric | E1D. Amount spent on items for dog(s) over past year - Healthcare products (eg vitamin supplements) | {1, Nothing}... |
| PA#J | Numeric | E1D. Amount spent on items for dog(s) over past year - Any other expenses                           | {1, Nothing}... |
| IS#A | Numeric | E2D. Reasons do not have insurance for dog(s) - Dont see the value                                  | {0, NO}...      |
| IS#B | Numeric | E2D. Reasons do not have insurance for dog(s) - Too expensive                                       | {0, NO}...      |
| IS#C | Numeric | E2D. Reasons do not have insurance for dog(s) - Dont know much about it/ not looked into it         | {0, NO}...      |
| IS#D | Numeric | E2D. Reasons do not have insurance for dog(s) - Didnt know it was available                         | {0, NO}...      |

|      |         |                                                                                                                  |                 |
|------|---------|------------------------------------------------------------------------------------------------------------------|-----------------|
| IS#E | Numeric | E2D. Reasons do not have insurance for dog(s) -<br>Some other reason                                             | {0, NO}...      |
| IT#  | String  | OE2. Other reasons do not have insurance for<br>dog(s)                                                           | None            |
| PC#A | Numeric | E1P. Amount spent on items for pony/horse(s)<br>over past year - Food                                            | {1, Nothing}... |
| PC#B | Numeric | E1P. Amount spent on items for pony/horse(s)<br>over past year - Veterinary services                             | {1, Nothing}... |
| PC#C | Numeric | E1P. Amount spent on items for pony/horse(s)<br>over past year - Clipping/ Grooming                              | {1, Nothing}... |
| PC#D | Numeric | E1P. Amount spent on items for pony/horse(s)<br>over past year - Training                                        | {1, Nothing}... |
| PC#E | Numeric | E1P. Amount spent on items for pony/horse(s)<br>over past year - Clothing/ Leads Bowls/ Toys/<br>Accessories     | {1, Nothing}... |
| PC#F | Numeric | E1P. Amount spent on items for pony/horse(s)<br>over past year - Boarding/ Day Care/ Minding/<br>Walking         | {1, Nothing}... |
| PC#G | Numeric | E1P. Amount spent on items for pony/horse(s)<br>over past year - Insurance                                       | {1, Nothing}... |
| PC#H | Numeric | E1P. Amount spent on items for pony/horse(s)<br>over past year - Registration Membership                         | {1, Nothing}... |
| PC#I | Numeric | E1P. Amount spent on items for pony/horse(s)<br>over past year - Healthcare products (eg vitamin<br>supplements) | {1, Nothing}... |
| PC#J | Numeric | E1P. Amount spent on items for pony/horse(s)<br>over past year - Any other expenses                              | {1, Nothing}... |
| JE#A | Numeric | E2P. Reasons do not have insurance for<br>pony/horse(s) - Dont see the value                                     | {0, NO}...      |
| JE#B | Numeric | E2P. Reasons do not have insurance for<br>pony/horse(s) - Too expensive                                          | {0, NO}...      |
| JE#C | Numeric | E2P. Reasons do not have insurance for<br>pony/horse(s) - Dont know much about it/ not<br>looked into it         | {0, NO}...      |
| JE#D | Numeric | E2P. Reasons do not have insurance for<br>pony/horse(s) - Didnt know it was available                            | {0, NO}...      |
| JE#E | Numeric | E2P. Reasons do not have insurance for<br>pony/horse(s) - Some other reason                                      | {0, NO}...      |
| JF#  | String  | OE2. Other reasons do not have insurance for<br>pony/horse(s)                                                    | None            |
| PE#A | Numeric | F1B. Amount spent on items for bird(s) over past<br>year - Food                                                  | {1, Nothing}... |
| PE#B | Numeric | F1B. Amount spent on items for bird(s) over past<br>year - Cages/ Housing                                        | {1, Nothing}... |

|      |         |                                                                                                        |                 |
|------|---------|--------------------------------------------------------------------------------------------------------|-----------------|
| PE#C | Numeric | F1B. Amount spent on items for bird(s) over past year - Consumables (eg water pH tester, litter etc)   | {1, Nothing}... |
| PE#D | Numeric | F1B. Amount spent on items for bird(s) over past year - Veterinary services                            | {1, Nothing}... |
| PE#E | Numeric | F1B. Amount spent on items for bird(s) over past year - Any other expenses                             | {1, Nothing}... |
| JL#A | Numeric | F2. Type of birds keep - Caged birds in your home                                                      | {0, NO}...      |
| JL#B | Numeric | F2. Type of birds keep - Birds in an outdoor aviary                                                    | {0, NO}...      |
| JL#C | Numeric | F2. Type of birds keep - Chickens in a hen house/ garden                                               | {0, NO}...      |
| JL#D | Numeric | F2. Type of birds keep - Other                                                                         | {0, NO}...      |
| JM#  | String  | OF2. Other type of birds keep                                                                          | None            |
| PG#A | Numeric | F1F. Amount spent on items for fish over past year - Food                                              | {1, Nothing}... |
| PG#B | Numeric | F1F. Amount spent on items for fish over past year - Aquarium and associated equipment                 | {1, Nothing}... |
| PG#C | Numeric | F1F. Amount spent on items for fish over past year - Consumables (eg water pH tester, litter etc)      | {1, Nothing}... |
| PG#D | Numeric | F1F. Amount spent on items for fish over past year - Veterinary services                               | {1, Nothing}... |
| PG#E | Numeric | F1F. Amount spent on items for fish over past year - Any other expenses                                | {1, Nothing}... |
| JS#A | Numeric | F3. Type of fish keep - Pondfish                                                                       | {0, NO}...      |
| JS#B | Numeric | F3. Type of fish keep - Goldfish in an aquarium                                                        | {0, NO}...      |
| JS#C | Numeric | F3. Type of fish keep - Tropical freshwater aquarium                                                   | {0, NO}...      |
| JS#D | Numeric | F3. Type of fish keep - Marine aquarium                                                                | {0, NO}...      |
| JS#E | Numeric | F3. Type of fish keep - Other                                                                          | {0, NO}...      |
| JT#  | String  | OF3. Other type of fish keep                                                                           | None            |
| PI#A | Numeric | F1R. Amount spent on items for rabbit(s) over past year - Food                                         | {1, Nothing}... |
| PI#B | Numeric | F1R. Amount spent on items for rabbit(s) over past year - Cages/ Housing                               | {1, Nothing}... |
| PI#C | Numeric | F1R. Amount spent on items for rabbit(s) over past year - Consumables (eg water pH tester, litter etc) | {1, Nothing}... |
| PI#D | Numeric | F1R. Amount spent on items for rabbit(s) over past year - Veterinary services                          | {1, Nothing}... |
| PI#E | Numeric | F1R. Amount spent on items for rabbit(s) over past year - Any other expenses                           | {1, Nothing}... |
| JZ#A | Numeric | G1. Items bought online - Pet                                                                          | {0, NO}...      |
| JZ#B | Numeric | G1. Items bought online - Pet food - Same quality as sold by vets                                      | {0, NO}...      |

|      |         |                                                                                                       |                                                          |
|------|---------|-------------------------------------------------------------------------------------------------------|----------------------------------------------------------|
| JZ#C | Numeric | G1. Items bought online - Pet food - Same quality as sold in supermarkets                             | {0, NO}...                                               |
| JZ#D | Numeric | G1. Items bought online - Consumables (e.g. litter, water pH tester for fish)                         | {0, NO}...                                               |
| JZ#E | Numeric | G1. Items bought online - Equipment (e.g. food bowls, water bubbler, aquarium decoration)             | {0, NO}...                                               |
| JZ#F | Numeric | G1. Items bought online - Toys and accessories                                                        | {0, NO}...                                               |
| JZ#G | Numeric | G1. Items bought online - Grooming products                                                           | {0, NO}...                                               |
| JZ#H | Numeric | G1. Items bought online - Healthcare products for my pet                                              | {0, NO}...                                               |
| JZ#I | Numeric | G1. Items bought online - None of the above                                                           | {0, NO}...                                               |
| KA#  | String  | OG1. Types of pet bought online                                                                       | None                                                     |
| KB#  | Numeric | G2. Number of other pets have                                                                         | {1, 1}...                                                |
| KC#A | Numeric | H1. Best sources of information for pet related issues - Pet shops                                    | {0, NO}...                                               |
| KC#B | Numeric | H1. Best sources of information for pet related issues - Breeders                                     | {0, NO}...                                               |
| KC#C | Numeric | H1. Best sources of information for pet related issues - SPCA                                         | {0, NO}...                                               |
| KC#D | Numeric | H1. Best sources of information for pet related issues - NZCAC (New Zealand Companion Animal Council) | {0, NO}...                                               |
| KC#E | Numeric | H1. Best sources of information for pet related issues - Vets                                         | {0, NO}...                                               |
| KC#F | Numeric | H1. Best sources of information for pet related issues - Family members                               | {0, NO}...                                               |
| KC#G | Numeric | H1. Best sources of information for pet related issues - Neighbours/ Friends                          | {0, NO}...                                               |
| KC#H | Numeric | H1. Best sources of information for pet related issues - The internet                                 | {0, NO}...                                               |
| KC#I | Numeric | H1. Best sources of information for pet related issues - Books/ The library                           | {0, NO}...                                               |
| KC#J | Numeric | H1. Best sources of information for pet related issues - Animal shows on television                   | {0, NO}...                                               |
| KC#K | Numeric | H1. Best sources of information for pet related issues - None of the above                            | {0, NO}...                                               |
| KD#  | Numeric | H2. Feel easily able to access enough quality information about responsible pet ownership             | {1, Yes, but only verbally from an expert like a vet}... |
| PK#A | Numeric | J1. Rating of importance of items for cats and dogs - De-sexing                                       | {1, Not important}...                                    |
| PK#B | Numeric | J1. Rating of importance of items for cats and dogs - Preventing predation                            | {1, Not important}...                                    |
| PK#C | Numeric | J1. Rating of importance of items for cats and dogs - Exercise                                        | {1, Not important}...                                    |

|      |         |                                                                                                                                                      |                                                            |
|------|---------|------------------------------------------------------------------------------------------------------------------------------------------------------|------------------------------------------------------------|
| PK#D | Numeric | J1. Rating of importance of items for cats and dogs - Microchipping                                                                                  | {1, Not important}...                                      |
| PK#E | Numeric | J1. Rating of importance of items for cats and dogs - Registration                                                                                   | {1, Not important}...                                      |
| PK#F | Numeric | J1. Rating of importance of items for cats and dogs - Annual vet checks and visits if required                                                       | {1, Not important}...                                      |
| PK#G | Numeric | J1. Rating of importance of items for cats and dogs - Veterinary visits if the animal is hurt/ injured/ sick                                         | {1, Not important}...                                      |
| PK#H | Numeric | J1. Rating of importance of items for cats and dogs - Providing adequate shelter                                                                     | {1, Not important}...                                      |
| PK#I | Numeric | J1. Rating of importance of items for cats and dogs - Providing nutritious diet and access to water                                                  | {1, Not important}...                                      |
| KN#  | Numeric | J2. Aware of any stray cats in local community                                                                                                       | {1, Yes}...                                                |
| KO#  | Numeric | J3. Ever feed any of the local stray cats                                                                                                            | {1, Regularly}...                                          |
| KP#  | Numeric | J4. Who should be responsible for looking after the stray cats in local community                                                                    | {1, They are self-sufficient and look after themselves}... |
| KQ#  | Numeric | J5. How issue of stray cats should be handled                                                                                                        | {1, Left alone}...                                         |
| KR#  | String  | OJ5. Other way issue of stray cats should be handled                                                                                                 | None                                                       |
| KS#  | Numeric | J6. Thoughts about predation by cats                                                                                                                 | {1, This is a significant issue}...                        |
| KT#  | Numeric | J7. Statement most agree with                                                                                                                        | {1, Cats should be confined to the owners property}...     |
| KU#  | Numeric | J8. Keeping cats indoors at night is something that should be enforced                                                                               | {1, No, this is unnecessary}...                            |
| KV#  | String  | OJ8. Other body that should enforce keeping cats indoors at night                                                                                    | None                                                       |
| KW#A | Numeric | J9. Been bitten by a dog in past 12 months - Yes - Me                                                                                                | {0, NO}...                                                 |
| KW#B | Numeric | J9. Been bitten by a dog in past 12 months - Yes - Other household member                                                                            | {0, NO}...                                                 |
| KW#C | Numeric | J9. Been bitten by a dog in past 12 months - No- one has been bitten                                                                                 | {0, NO}...                                                 |
| KX#  | Numeric | J10. Have a dog or other companion animal that has been bitten by a dog in the past 12 months                                                        | {1, Yes}...                                                |
| KY#A | Numeric | J11. Strategies would support - Education programs for children on how to be safe around dogs                                                        | {0, NO}...                                                 |
| KY#B | Numeric | J11. Strategies would support - Education programs for teenagers and adults about how to interpret basic dog behaviour and interact with dogs safely | {0, NO}...                                                 |

|      |         |                                                                                                                                                                                                            |                                     |
|------|---------|------------------------------------------------------------------------------------------------------------------------------------------------------------------------------------------------------------|-------------------------------------|
| KY#C | Numeric | J11. Strategies would support - Registration of owners rather than dogs so that education about responsible pet ownership can be provided directly to owners                                               | {0, NO}...                          |
| KY#D | Numeric | J11. Strategies would support - Additional enforcement powers given to local councils to address specific issues on a case by case basis                                                                   | {0, NO}...                          |
| KY#E | Numeric | J11. Strategies would support - None of the above                                                                                                                                                          | {0, NO}...                          |
| KZ#  | Numeric | J12. Most appropriate course of action when a dog has bitten or injured a person                                                                                                                           | {1, The dog should be destroyed}... |
| LA#  | String  | OJ12. Other most appropriate course of action when a dog has bitten or injured a person                                                                                                                    | None                                |
| LB#A | Numeric | J13. What should happen to owner of a dog that has bitten a person - The owner should be fined                                                                                                             | {0, NO}...                          |
| LB#B | Numeric | J13. What should happen to owner of a dog that has bitten a person - The owner should attend mandated education program on responsible dog ownership and behaviour management                              | {0, NO}...                          |
| LB#C | Numeric | J13. What should happen to owner of a dog that has bitten a person - If the dog has had to be destroyed, the owner should be banned from keeping dogs for a fixed period of time                           | {0, NO}...                          |
| LB#D | Numeric | J13. What should happen to owner of a dog that has bitten a person - None of the above                                                                                                                     | {0, NO}...                          |
| LC#  | Numeric | J14. Most appropriate course of action when a dog has bitten or injured another dog                                                                                                                        | {1, The dog should be destroyed}... |
| LD#  | String  | OJ14. Other most appropriate course of action when a dog has bitten or injured another dog                                                                                                                 | None                                |
| LE#A | Numeric | J15. What should happen to owner of a dog that has bitten another dog or other companion animal - The owner should be fined                                                                                | {0, NO}...                          |
| LE#B | Numeric | J15. What should happen to owner of a dog that has bitten another dog or other companion animal - The owner should attend mandated education program on responsible dog ownership and behaviour management | {0, NO}...                          |

|      |         |                                                                                                                                                                                                               |                               |
|------|---------|---------------------------------------------------------------------------------------------------------------------------------------------------------------------------------------------------------------|-------------------------------|
| LE#C | Numeric | J15. What should happen to owner of a dog that has bitten another dog or other companion animal - If the dog has had to be destroyed, the owner should be banned from keeping dogs for a fixed period of time | {0, NO}...                    |
| LE#D | Numeric | J15. What should happen to owner of a dog that has bitten another dog or other companion animal - None of the above                                                                                           | {0, NO}...                    |
| LF#  | Numeric | K1. Work status                                                                                                                                                                                               | {1, Full time}...             |
| LG#  | Numeric | K2. Number of adults aged 18 years and over live in household                                                                                                                                                 | {1, 1}...                     |
| LH#  | Numeric | K3. Number of children aged 17 years or younger live in household                                                                                                                                             | {1, None}...                  |
| PL#A | Numeric | K4. Age of the children in household - 0-4 years                                                                                                                                                              | {0, NO}...                    |
| PL#B | Numeric | K4. Age of the children in household - 5-8 years                                                                                                                                                              | {0, NO}...                    |
| PL#C | Numeric | K4. Age of the children in household - 9-12 years                                                                                                                                                             | {0, NO}...                    |
| PL#D | Numeric | K4. Age of the children in household - 13-17 years                                                                                                                                                            | {0, NO}...                    |
| LK#  | Numeric | K5. Amount of grocery shopping for household personally do                                                                                                                                                    | {1, All of it}...             |
| LL#  | Numeric | K6. Marital status                                                                                                                                                                                            | {1, Single/ Never married}... |
| LM#  | Numeric | K7. Total household income before tax                                                                                                                                                                         | {1, Under \$40,000}...        |
| LN#  | Numeric | K8. Highest level of schooling completed                                                                                                                                                                      | {1, Below Year 13}...         |
| OF#  | Numeric | W1. Household Target weight                                                                                                                                                                                   | None                          |

**Supplementary Table 2. Demographic characteristics of 1,572 survey respondents in New Zealand stratified by species of pet owned.**

| Variable           | Dogs |       | Cats |       | Horses |       | Birds |       | Rabbits |       | Fish |       | None |       |
|--------------------|------|-------|------|-------|--------|-------|-------|-------|---------|-------|------|-------|------|-------|
|                    | N    | %     | N    | %     | N      | %     | N     | %     | N       | %     | N    | %     | N    | %     |
| Number of Owners   | 443  |       | 696  |       | 32     |       | 103   |       | 55      |       | 159  |       | 559  |       |
| Region             |      |       |      |       |        |       |       |       |         |       |      |       |      |       |
| Auckland           | 149  | 33.6% | 211  | 30.3% | 4      | 12.5% | 31    | 30.1% | 21      | 38.2% | 69   | 43.4% | 211  | 37.7% |
| Wellington         | 43   | 9.7%  | 69   | 9.9%  | 11     | 34.4% | 7     | 6.8%  | 2       | 3.6%  | 16   | 10.1% | 71   | 12.7% |
| Other North Island | 142  | 32.1% | 241  | 34.6% | 10     | 31.3% | 36    | 35.0% | 13      | 23.6% | 43   | 27.0% | 154  | 27.5% |
| Christchurch       | 62   | 14.0% | 91   | 13.1% | 9      | 28.1% | 18    | 17.5% | 11      | 20.0% | 18   | 11.3% | 57   | 10.2% |
| Other South Island | 47   | 10.6% | 84   | 12.1% | 8      | 25.0% | 11    | 10.7% | 8       | 14.5% | 13   | 8.2%  | 66   | 11.8% |
| Location Type      |      |       |      |       |        |       |       |       |         |       |      |       |      |       |
| Urban              | 166  | 37.5% | 262  | 37.6% | 4      | 12.5% | 47    | 45.6% | 19      | 34.5% | 69   | 43.4% | 223  | 39.9% |
| Suburban           | 168  | 37.9% | 270  | 38.8% | 8      | 25.0% | 32    | 31.1% | 22      | 40.0% | 63   | 39.6% | 260  | 46.5% |
| Regional Centre    | 26   | 5.9%  | 54   | 7.8%  | 1      | 3.1%  | 2     | 1.9%  | 5       | 9.1%  | 7    | 4.4%  | 36   | 6.4%  |
| Rural              | 28   | 6.3%  | 110  | 15.8% | 19     | 59.4% | 22    | 21.4% | 9       | 16.4% | 20   | 12.6% | 40   | 7.2%  |
| Age                |      |       |      |       |        |       |       |       |         |       |      |       |      |       |
| 18-24              | 67   | 15.1% | 95   | 13.6% | 10     | 31.3% | 14    | 13.6% | 12      | 21.8% | 28   | 17.6% | 81   | 14.5% |
| 25-29              | 45   | 10.2% | 44   | 6.3%  | 1      | 3.1%  | 9     | 8.7%  | 6       | 10.9% | 15   | 9.4%  | 38   | 6.8%  |
| 30-34              | 50   | 11.3% | 62   | 8.9%  | 2      | 6.3%  | 11    | 10.7% | 5       | 9.1%  | 15   | 9.4%  | 56   | 10.0% |
| 35-39              | 47   | 10.6% | 77   | 11.1% | 4      | 12.5% | 15    | 14.6% | 10      | 18.2% | 21   | 13.2% | 38   | 6.8%  |
| 40-44              | 30   | 6.8%  | 61   | 8.8%  | 3      | 9.4%  | 11    | 10.7% | 11      | 20.0% | 20   | 12.6% | 42   | 7.5%  |
| 45-49              | 42   | 9.5%  | 74   | 10.6% | 2      | 6.3%  | 6     | 5.8%  | 5       | 9.1%  | 17   | 10.7% | 35   | 6.3%  |
| 50-54              | 40   | 9.0%  | 55   | 7.9%  | 2      | 6.3%  | 9     | 8.7%  | 3       | 5.5%  | 8    | 5.0%  | 25   | 4.5%  |
| 55-59              | 40   | 9.0%  | 59   | 8.5%  | 2      | 6.3%  | 9     | 8.7%  | 1       | 1.8%  | 16   | 10.1% | 36   | 6.4%  |
| 60-64              | 28   | 6.3%  | 64   | 9.2%  | 4      | 12.5% | 4     | 3.9%  | 1       | 1.8%  | 6    | 3.8%  | 64   | 11.4% |
| 65-69              | 24   | 5.4%  | 50   | 7.2%  | 2      | 6.3%  | 8     | 7.8%  | 1       | 1.8%  | 6    | 3.8%  | 45   | 8.1%  |
| 70 and older       | 30   | 6.8%  | 55   | 7.9%  | 0      | 0.0%  | 7     | 6.8%  | 0       | 0.0%  | 7    | 4.4%  | 99   | 17.7% |
| Gender             |      |       |      |       |        |       |       |       |         |       |      |       |      |       |
| Male               | 210  | 47.4% | 314  | 45.1% | 14     | 43.8% | 58    | 56.3% | 21      | 38.2% | 73   | 45.9% | 292  | 52.2% |
| Female             | 233  | 52.6% | 382  | 54.9% | 18     | 56.3% | 45    | 43.7% | 34      | 61.8% | 86   | 54.1% | 267  | 47.8% |
| Ethnic Group       |      |       |      |       |        |       |       |       |         |       |      |       |      |       |
| NZ European        | 349  | 78.8% | 588  | 84.5% | 24     | 75.0% | 77    | 74.8% | 32      | 58.2% | 110  | 69.2% | 407  | 72.8% |

# Supplementary Information

Gates et al.

New Zealand Veterinary Journal

S3

|                                |     |       |     |       |    |       |    |       |    |       |    |       |     |       |
|--------------------------------|-----|-------|-----|-------|----|-------|----|-------|----|-------|----|-------|-----|-------|
| Maori                          | 12  | 2.7%  | 17  | 2.4%  | 2  | 6.3%  | 5  | 4.9%  | 3  | 5.5%  | 6  | 3.8%  | 13  | 2.3%  |
| Other                          | 82  | 18.5% | 91  | 13.1% | 6  | 18.8% | 21 | 20.4% | 20 | 36.4% | 43 | 27.0% | 139 | 24.9% |
| Work Status                    |     |       |     |       |    |       |    |       |    |       |    |       |     |       |
| Full time                      | 229 | 51.7% | 340 | 48.9% | 18 | 56.3% | 54 | 52.4% | 28 | 50.9% | 80 | 50.3% | 208 | 37.2% |
| Part time                      | 108 | 24.4% | 185 | 26.6% | 6  | 18.8% | 24 | 23.3% | 20 | 36.4% | 39 | 24.5% | 124 | 22.2% |
| Not working                    | 106 | 23.9% | 171 | 24.6% | 8  | 25.0% | 25 | 24.3% | 7  | 12.7% | 40 | 25.2% | 227 | 40.6% |
| Highest Education              |     |       |     |       |    |       |    |       |    |       |    |       |     |       |
| Below Year 13                  | 67  | 15.1% | 110 | 15.8% | 6  | 18.8% | 16 | 15.5% | 5  | 9.1%  | 19 | 11.9% | 75  | 13.4% |
| Completed Year 13              | 70  | 15.8% | 103 | 14.8% | 4  | 12.5% | 16 | 15.5% | 7  | 12.7% | 27 | 17.0% | 79  | 14.1% |
| Technical or Further Education | 112 | 25.3% | 209 | 30.0% | 10 | 31.3% | 28 | 27.2% | 15 | 27.3% | 50 | 31.4% | 140 | 25.0% |
| University                     | 178 | 40.2% | 245 | 35.2% | 12 | 37.5% | 41 | 39.8% | 26 | 47.3% | 61 | 38.4% | 251 | 44.9% |
| Prefer not to say              | 16  | 3.6%  | 29  | 4.2%  | 0  | 0.0%  | 2  | 1.9%  | 2  | 3.6%  | 2  | 1.3%  | 14  | 2.5%  |
| Household Income               |     |       |     |       |    |       |    |       |    |       |    |       |     |       |
| Under \$40k                    | 72  | 16.3% | 141 | 20.3% | 6  | 18.8% | 17 | 16.5% | 7  | 12.7% | 14 | 8.8%  | 155 | 27.7% |
| \$40k - \$70k                  | 94  | 21.2% | 166 | 23.9% | 6  | 18.8% | 37 | 35.9% | 12 | 21.8% | 41 | 25.8% | 139 | 24.9% |
| \$71k - \$90k                  | 63  | 14.2% | 82  | 11.8% | 4  | 12.5% | 19 | 18.4% | 8  | 14.5% | 22 | 13.8% | 41  | 7.3%  |
| More than \$90k                | 146 | 33.0% | 201 | 28.9% | 13 | 40.6% | 25 | 24.3% | 21 | 38.2% | 52 | 32.7% | 122 | 21.8% |
| Prefer not to say              | 68  | 15.3% | 106 | 15.2% | 3  | 9.4%  | 5  | 4.9%  | 7  | 12.7% | 30 | 18.9% | 102 | 18.2% |
| Marital Status                 |     |       |     |       |    |       |    |       |    |       |    |       |     |       |
| Single or Never Married        | 105 | 23.7% | 156 | 22.4% | 10 | 31.3% | 23 | 22.3% | 13 | 23.6% | 35 | 22.0% | 137 | 24.5% |
| Living Together                | 91  | 20.5% | 134 | 19.3% | 6  | 18.8% | 19 | 18.4% | 6  | 10.9% | 29 | 18.2% | 58  | 10.4% |
| Married                        | 215 | 48.5% | 313 | 45.0% | 13 | 40.6% | 51 | 49.5% | 32 | 58.2% | 81 | 50.9% | 278 | 49.7% |
| Divorced or Widowed            | 32  | 7.2%  | 93  | 13.4% | 3  | 9.4%  | 10 | 9.7%  | 4  | 7.3%  | 14 | 8.8%  | 86  | 15.4% |
| Number of Adults               |     |       |     |       |    |       |    |       |    |       |    |       |     |       |
| 1                              | 45  | 10.2% | 116 | 16.7% | 5  | 15.6% | 15 | 14.6% | 6  | 10.9% | 16 | 10.1% | 115 | 20.6% |
| 2                              | 269 | 60.7% | 391 | 56.2% | 15 | 46.9% | 53 | 51.5% | 32 | 58.2% | 91 | 57.2% | 294 | 52.6% |
| 3                              | 73  | 16.5% | 118 | 17.0% | 7  | 21.9% | 21 | 20.4% | 7  | 12.7% | 34 | 21.4% | 76  | 13.6% |
| 4                              | 31  | 7.0%  | 41  | 5.9%  | 4  | 12.5% | 11 | 10.7% | 6  | 10.9% | 11 | 6.9%  | 41  | 7.3%  |

# Supplementary Information

*Gates et al.*

*New Zealand Veterinary Journal*

*S4*

|                    |     |       |     |       |    |       |    |       |    |       |    |       |     |       |
|--------------------|-----|-------|-----|-------|----|-------|----|-------|----|-------|----|-------|-----|-------|
| 5                  | 14  | 3.2%  | 16  | 2.3%  | 0  | 0.0%  | 0  | 0.0%  | 2  | 3.6%  | 2  | 1.3%  | 18  | 3.2%  |
| 6 or more          | 11  | 2.5%  | 14  | 2.0%  | 1  | 3.1%  | 3  | 2.9%  | 2  | 3.6%  | 5  | 3.1%  | 15  | 2.7%  |
| Number of Children |     |       |     |       |    |       |    |       |    |       |    |       |     |       |
| None               | 264 | 59.6% | 418 | 60.1% | 21 | 65.6% | 58 | 56.3% | 16 | 29.1% | 70 | 44.0% | 406 | 72.6% |
| 1                  | 85  | 19.2% | 119 | 17.1% | 7  | 21.9% | 17 | 16.5% | 11 | 20.0% | 34 | 21.4% | 76  | 13.6% |
| 2                  | 64  | 14.4% | 104 | 14.9% | 2  | 6.3%  | 17 | 16.5% | 14 | 25.5% | 37 | 23.3% | 56  | 10.0% |
| 3                  | 22  | 5.0%  | 38  | 5.5%  | 1  | 3.1%  | 9  | 8.7%  | 8  | 14.5% | 13 | 8.2%  | 11  | 2.0%  |
| 4                  | 5   | 1.1%  | 13  | 1.9%  | 1  | 3.1%  | 2  | 1.9%  | 4  | 7.3%  | 3  | 1.9%  | 8   | 1.4%  |
| 5                  | 1   | 0.2%  | 2   | 0.3%  | 0  | 0.0%  | 0  | 0.0%  | 1  | 1.8%  | 0  | 0.0%  | 2   | 0.4%  |
| 6 or more          | 2   | 0.5%  | 2   | 0.3%  | 0  | 0.0%  | 0  | 0.0%  | 1  | 1.8%  | 2  | 1.3%  | 0   | 0.0%  |

**Supplementary Table 3: Univariable analysis of predictors for owning at least one pet among 1,572 survey respondents in New Zealand.**

| Variable           | Respondents<br>Owning ≥1 Pet |       | Respondents Owning<br>No Pets |       | Univariable analysis |             |         |
|--------------------|------------------------------|-------|-------------------------------|-------|----------------------|-------------|---------|
|                    | N                            | %     | N                             | %     | OR                   | 95% CI      | p-value |
| Region             |                              |       |                               |       |                      |             |         |
| Auckland           | 329                          | 32.5% | 211                           | 37.7% | 1.00                 | -           | -       |
| Wellington         | 103                          | 10.2% | 71                            | 12.7% | 0.93                 | 0.65 – 1.32 | 0.685   |
| Other North Island | 324                          | 32.0% | 154                           | 27.5% | 1.35                 | 1.04 – 1.75 | 0.023   |
| Christchurch       | 145                          | 14.3% | 57                            | 10.2% | 1.63                 | 1.15 – 2.33 | 0.006   |
| Other South Island | 112                          | 11.1% | 66                            | 11.8% | 1.09                 | 0.77 – 1.55 | 0.635   |
| Location Type      |                              |       |                               |       |                      |             |         |
| Urban              | 381                          | 37.6% | 223                           | 39.9% | 1.00                 | -           | -       |
| Suburban           | 417                          | 41.2% | 260                           | 46.5% | 0.94                 | 0.75 – 1.18 | 0.584   |
| Regional Centre    | 69                           | 6.8%  | 36                            | 6.4%  | 1.12                 | 0.73 – 1.74 | 0.605   |
| Rural              | 146                          | 14.4% | 40                            | 7.2%  | 2.14                 | 1.46 – 3.18 | 0.000   |
| Age                |                              |       |                               |       |                      |             |         |
| 18-24              | 131                          | 12.9% | 81                            | 14.5% | 1.00                 | -           | -       |
| 25-29              | 82                           | 8.1%  | 38                            | 6.8%  | 1.33                 | 0.83 – 2.16 | 0.233   |
| 30-34              | 99                           | 9.8%  | 56                            | 10.0% | 1.09                 | 0.71 – 1.68 | 0.684   |
| 35-39              | 106                          | 10.5% | 38                            | 6.8%  | 1.72                 | 1.09 – 2.76 | 0.021   |
| 40-44              | 87                           | 8.6%  | 42                            | 7.5%  | 1.28                 | 0.81 – 2.04 | 0.293   |
| 45-49              | 104                          | 10.3% | 35                            | 6.3%  | 1.83                 | 1.15 – 2.97 | 0.012   |
| 50-54              | 84                           | 8.3%  | 25                            | 4.5%  | 2.07                 | 1.24 – 3.56 | 0.006   |
| 55-59              | 88                           | 8.7%  | 36                            | 6.4%  | 1.51                 | 0.94 – 2.45 | 0.089   |
| 60-64              | 82                           | 8.1%  | 64                            | 11.4% | 0.79                 | 0.51 – 1.22 | 0.287   |
| 65-69              | 73                           | 7.2%  | 45                            | 8.1%  | 1.00                 | 0.63 – 1.60 | 0.990   |
| 70 and older       | 77                           | 7.6%  | 99                            | 17.7% | 0.48                 | 0.31 – 0.72 | 0.000   |
| Gender             |                              |       |                               |       |                      |             |         |
| Male               | 292                          | 28.8% | 480                           | 85.9% | 1.00                 | -           | -       |
| Female             | 267                          | 26.4% | 533                           | 95.3% | 1.21                 | 0.99 – 1.49 | 0.066   |
| Ethnic Group       |                              |       |                               |       |                      |             |         |
| NZ European        | 826                          | 81.5% | 407                           | 72.8% | 1.00                 | -           | -       |
| Maori              | 25                           | 2.5%  | 13                            | 2.3%  | 0.95                 | 0.49 – 1.93 | 0.877   |
| Other              | 162                          | 16.0% | 162                           | 29.0% | 0.57                 | 0.44 – 0.74 | 0.000   |
| Work Status        |                              |       |                               |       |                      |             |         |
| Full time          | 498                          | 49.2% | 208                           | 37.2% | 1.00                 | -           | -       |

# Supplementary Information

Gates *et al.*

New Zealand Veterinary Journal

S6

|                                |     |       |     |       |      |             |       |
|--------------------------------|-----|-------|-----|-------|------|-------------|-------|
| Part time                      | 264 | 26.1% | 124 | 22.2% | 0.88 | 0.68 – 1.16 | 0.390 |
| Not working                    | 251 | 24.8% | 227 | 40.6% | 0.46 | 0.36 – 0.59 | 0.000 |
| Highest Education              |     |       |     |       |      |             |       |
| Below Year 13                  | 151 | 14.9% | 75  | 13.4% | 1.00 | -           | -     |
| Completed Year 13              | 153 | 15.1% | 79  | 14.1% | 0.96 | 0.65 – 1.42 | 0.845 |
| Technical or Further Education | 289 | 28.5% | 140 | 25.0% | 1.02 | 0.72 – 1.44 | 0.886 |
| University                     | 383 | 37.8% | 251 | 44.9% | 0.75 | 0.55 – 1.04 | 0.089 |
| Prefer not to say              | 37  | 3.7%  | 14  | 2.5%  | 1.31 | 0.68 – 2.64 | 0.429 |
| Household Income               |     |       |     |       |      |             |       |
| Under \$40k                    | 193 | 19.1% | 155 | 27.7% | 1.00 | -           | -     |
| \$40k - \$70k                  | 226 | 22.3% | 139 | 24.9% | 1.31 | 0.97 – 1.76 | 0.080 |
| \$71k - \$90k                  | 132 | 13.0% | 41  | 7.3%  | 2.58 | 1.72 – 3.92 | 0.000 |
| More than \$90k                | 308 | 30.4% | 122 | 21.8% | 2.03 | 1.51 – 2.73 | 0.000 |
| Prefer not to say              | 154 | 15.2% | 154 | 27.5% | 1.21 | 0.87 – 1.68 | 0.249 |
| Marital Status                 |     |       |     |       |      |             |       |
| Single or Never Married        | 228 | 22.5% | 137 | 24.5% | 1.00 | -           | -     |
| Living Together                | 192 | 19.0% | 58  | 10.4% | 1.98 | 1.39 – 2.87 | 0.000 |
| Married                        | 478 | 47.2% | 278 | 49.7% | 1.03 | 0.80 – 1.34 | 0.805 |
| Divorced or Widowed            | 115 | 11.4% | 86  | 15.4% | 0.80 | 0.56 – 1.14 | 0.221 |
| Number of Adults               |     |       |     |       |      |             |       |
| 1                              | 150 | 14.8% | 115 | 20.6% | 1.00 | -           | -     |
| 2                              | 583 | 57.6% | 294 | 52.6% | 1.52 | 1.15 – 2.01 | 0.003 |
| 3                              | 170 | 16.8% | 76  | 13.6% | 1.71 | 1.19 – 2.47 | 0.004 |
| 4                              | 66  | 6.5%  | 41  | 7.3%  | 1.23 | 0.78 – 1.96 | 0.369 |
| 5                              | 25  | 2.5%  | 18  | 3.2%  | 1.06 | 0.56 – 2.07 | 0.850 |
| 6 or more                      | 19  | 1.9%  | 15  | 2.7%  | 0.97 | 0.47 – 2.02 | 0.936 |
| Number of Children             |     |       |     |       |      |             |       |
| None                           | 622 | 61.4% | 406 | 72.6% | 1.00 | -           | -     |
| 1                              | 174 | 17.2% | 76  | 13.6% | 1.49 | 1.11 – 2.02 | 0.008 |
| 2                              | 147 | 14.5% | 56  | 10.0% | 1.71 | 1.24 – 2.40 | 0.001 |
| 3                              | 50  | 4.9%  | 11  | 2.0%  | 2.96 | 1.59 – 6.07 | 0.001 |
| 4                              | 16  | 1.6%  | 8   | 1.4%  | 1.31 | 0.57 – 3.24 | 0.543 |
| 5 or more                      | 4   | 0.4%  | 2   | 0.4%  | 1.31 | 0.25 – 9.45 | 0.759 |

**Supplementary Table 4. Univariable analysis of predictors for taking a pet to the veterinarian at least once per year amongst 1,013 pet-owning survey respondents in New Zealand.**

| Variable                   | ≥1 Veterinary Visit |       | No Veterinary Visits |       | Univariable analysis |             |         |
|----------------------------|---------------------|-------|----------------------|-------|----------------------|-------------|---------|
|                            | N                   | %     | N                    | %     | OR                   | 95% CI      | p-value |
| Owned Dog                  |                     |       |                      |       |                      |             |         |
| No                         | 333                 | 46.8% | 237                  | 78.5% | 1.00                 | -           | -       |
| Yes                        | 378                 | 53.2% | 65                   | 21.5% | 4.14                 | 3.04 – 5.69 | < 0.001 |
| Owned Cat                  |                     |       |                      |       |                      |             |         |
| No                         | 212                 | 29.8% | 105                  | 34.8% | 1.00                 | -           | -       |
| Yes                        | 499                 | 70.2% | 197                  | 65.2% | 1.25                 | 0.94 – 1.67 | 0.120   |
| Owned Horse                |                     |       |                      |       |                      |             |         |
| No                         | 687                 | 96.6% | 294                  | 97.4% | 1.00                 | -           | -       |
| Yes                        | 24                  | 3.4%  | 8                    | 2.6%  | 1.28                 | 0.59 – 3.08 | 0.546   |
| Owned Bird                 |                     |       |                      |       |                      |             |         |
| No                         | 649                 | 91.3% | 261                  | 86.4% | 1.00                 | -           | -       |
| Yes                        | 62                  | 8.7%  | 41                   | 13.6% | 0.61                 | 0.40 – 0.93 | 0.020   |
| Owned Rabbit               |                     |       |                      |       |                      |             |         |
| No                         | 675                 | 94.9% | 283                  | 93.7% | 1.00                 | -           | -       |
| Yes                        | 36                  | 5.1%  | 19                   | 6.3%  | 0.79                 | 0.45 – 1.44 | 0.431   |
| Owned Fish                 |                     |       |                      |       |                      |             |         |
| No                         | 608                 | 85.5% | 246                  | 81.5% | 1.00                 | -           | -       |
| Yes                        | 103                 | 14.5% | 56                   | 18.5% | 0.74                 | 0.52 – 1.07 | 0.105   |
| Total Number of Pets Owned |                     |       |                      |       |                      |             |         |
| 1                          | 303                 | 42.6% | 161                  | 53.3% | 1.00                 | -           | -       |
| 2                          | 173                 | 24.3% | 49                   | 16.2% | 1.87                 | 1.30 – 2.73 | 0.001   |
| 3                          | 74                  | 10.4% | 30                   | 9.9%  | 1.31                 | 0.83 – 2.11 | 0.254   |
| 4                          | 40                  | 5.6%  | 13                   | 4.3%  | 1.63                 | 0.87 – 3.26 | 0.141   |
| 5                          | 23                  | 3.2%  | 9                    | 3.0%  | 1.36                 | 0.63 – 3.16 | 0.450   |
| 6 or greater               | 98                  | 13.8% | 40                   | 13.2% | 1.30                 | 0.87 – 1.99 | 0.212   |
| Role of Pet in Household   |                     |       |                      |       |                      |             |         |
| Other                      | 29                  | 4.1%  | 54                   | 17.9% | 1.00                 | -           | -       |
| Trusted Companion          | 83                  | 11.7% | 35                   | 11.6% | 4.41                 | 2.45 – 8.14 | < 0.001 |
| Family Member              | 599                 | 84.2% | 213                  | 70.5% | 5.24                 | 3.27 – 8.54 | < 0.001 |
| Region                     |                     |       |                      |       |                      |             |         |
| Auckland                   | 235                 | 33.1% | 94                   | 31.1% | 1.00                 | -           | -       |
| Wellington                 | 73                  | 10.3% | 30                   | 9.9%  | 0.97                 | 0.60 – 1.60 | 0.914   |

# Supplementary Information

Gates et al.

New Zealand Veterinary Journal

S8

|                                |     |       |     |       |      |             |       |
|--------------------------------|-----|-------|-----|-------|------|-------------|-------|
| Other North Island             | 213 | 30.0% | 111 | 36.8% | 0.77 | 0.55 – 1.06 | 0.118 |
| Christchurch                   | 113 | 15.9% | 32  | 10.6% | 1.41 | 0.90 – 2.26 | 0.141 |
| Other South Island             | 77  | 10.8% | 35  | 11.6% | 0.88 | 0.56 – 1.41 | 0.591 |
| Location Type                  |     |       |     |       |      |             |       |
| Urban                          | 265 | 37.3% | 116 | 38.4% | 1.00 | -           | -     |
| Suburban                       | 296 | 41.6% | 121 | 40.1% | 1.07 | 0.79 – 1.45 | 0.659 |
| Regional Centre                | 44  | 6.2%  | 25  | 8.3%  | 0.77 | 0.45 – 1.33 | 0.341 |
| Rural                          | 106 | 14.9% | 40  | 13.2% | 1.16 | 0.76 – 1.79 | 0.493 |
| Age                            |     |       |     |       |      |             |       |
| 18-24                          | 92  | 12.9% | 39  | 12.9% | 1.00 | -           | -     |
| 25-29                          | 65  | 9.1%  | 17  | 5.6%  | 1.62 | 0.86 – 3.17 | 0.147 |
| 30-34                          | 62  | 8.7%  | 37  | 12.3% | 0.71 | 0.41 – 1.24 | 0.226 |
| 35-39                          | 82  | 11.5% | 24  | 7.9%  | 1.45 | 0.81 – 2.64 | 0.218 |
| 40-44                          | 62  | 8.7%  | 25  | 8.3%  | 1.05 | 0.58 – 1.92 | 0.869 |
| 45-49                          | 69  | 9.7%  | 35  | 11.6% | 0.84 | 0.48 – 1.46 | 0.525 |
| 50-54                          | 59  | 8.3%  | 25  | 8.3%  | 1.00 | 0.55 – 1.83 | 0.999 |
| 55-59                          | 66  | 9.3%  | 22  | 7.3%  | 1.27 | 0.69 – 2.37 | 0.440 |
| 60-64                          | 54  | 7.6%  | 28  | 9.3%  | 0.82 | 0.45 – 1.48 | 0.504 |
| 65-69                          | 44  | 6.2%  | 29  | 9.6%  | 0.64 | 0.35 – 1.17 | 0.149 |
| 70 and older                   | 56  | 7.9%  | 21  | 7.0%  | 1.13 | 0.61 – 2.14 | 0.701 |
| Gender                         |     |       |     |       |      |             |       |
| Male                           | 334 | 47.0% | 146 | 48.3% | 1.00 | -           | -     |
| Female                         | 377 | 53.0% | 156 | 51.7% | 1.06 | 0.81 – 1.38 | 0.690 |
| Ethnic Group                   |     |       |     |       |      |             |       |
| NZ European                    | 584 | 82.1% | 242 | 80.1% | 1.00 | -           | -     |
| Maori                          | 16  | 2.3%  | 9   | 3.0%  | 0.74 | 0.33 – 1.76 | 0.471 |
| Other                          | 111 | 15.6% | 51  | 16.9% | 0.90 | 0.63 – 1.31 | 0.578 |
| Work Status                    |     |       |     |       |      |             |       |
| Full time                      | 365 | 51.3% | 133 | 44.0% | 1.00 | -           | -     |
| Part time                      | 181 | 25.5% | 83  | 27.5% | 0.79 | 0.57 – 1.10 | 0.168 |
| Not working                    | 165 | 23.2% | 86  | 28.5% | 0.70 | 0.50 – 0.97 | 0.032 |
| Highest Education              |     |       |     |       |      |             |       |
| Below Year 13                  | 104 | 14.6% | 47  | 15.6% | 1.00 | -           | -     |
| Completed Year 13              | 106 | 14.9% | 47  | 15.6% | 1.02 | 0.63 – 1.66 | 0.939 |
| Technical or Further Education | 197 | 27.7% | 92  | 30.5% | 0.96 | 0.63 – 1.47 | 0.879 |
| University                     | 282 | 39.7% | 101 | 33.4% | 1.26 | 0.83 – 1.90 | 0.269 |
| Prefer not to say              | 22  | 3.1%  | 15  | 5.0%  | 0.66 | 0.32 – 1.41 | 0.277 |

# Supplementary Information

Gates et al.

New Zealand Veterinary Journal

S9

|                         |     |       |     |       |      |             |       |
|-------------------------|-----|-------|-----|-------|------|-------------|-------|
| Household Income        |     |       |     |       |      |             |       |
| Under \$40k             | 123 | 17.3% | 70  | 23.2% | 1.00 | -           | -     |
| \$40k - \$70k           | 144 | 20.3% | 82  | 27.2% | 0.99 | 0.67 – 1.49 | 0.998 |
| \$71k - \$90k           | 99  | 13.9% | 33  | 10.9% | 1.71 | 1.05 – 2.81 | 0.033 |
| More than \$90k         | 238 | 33.5% | 70  | 23.2% | 1.93 | 1.30 – 2.87 | 0.001 |
| Prefer not to say       | 107 | 15.0% | 47  | 15.6% | 1.30 | 0.83 – 2.04 | 0.261 |
| Marital Status          |     |       |     |       |      |             |       |
| Single or Never Married | 157 | 22.1% | 71  | 23.5% | 1.00 | -           | -     |
| Living Together         | 141 | 19.8% | 51  | 16.9% | 1.25 | 0.82 – 1.92 | 0.304 |
| Married                 | 340 | 47.8% | 138 | 45.7% | 1.11 | 0.79 – 1.57 | 0.537 |
| Divorced or Widowed     | 73  | 10.3% | 42  | 13.9% | 0.78 | 0.49 – 1.26 | 0.317 |
| Number of Adults        |     |       |     |       |      |             |       |
| 1                       | 94  | 13.2% | 56  | 18.5% | 1.00 | -           | -     |
| 2                       | 425 | 59.8% | 158 | 52.3% | 1.60 | 1.09 – 2.33 | 0.014 |
| 3                       | 114 | 16.0% | 56  | 18.5% | 1.21 | 0.76 – 1.92 | 0.411 |
| 4                       | 47  | 6.6%  | 19  | 6.3%  | 1.47 | 0.80 – 2.80 | 0.226 |
| 5                       | 20  | 2.8%  | 5   | 1.7%  | 2.38 | 0.91 – 7.48 | 0.100 |
| 6 or more               | 11  | 1.5%  | 8   | 2.6%  | 0.82 | 0.31 – 2.23 | 0.687 |
| Number of Children      |     |       |     |       |      |             |       |
| None                    | 434 | 61.0% | 188 | 62.3% | 1.00 | -           | -     |
| 1                       | 130 | 18.3% | 44  | 14.6% | 1.28 | 0.88 – 1.89 | 0.206 |
| 2                       | 102 | 14.3% | 45  | 14.9% | 0.98 | 0.67 – 1.46 | 0.927 |
| 3                       | 34  | 4.8%  | 16  | 5.3%  | 0.92 | 0.50 – 1.74 | 0.793 |
| 4                       | 9   | 1.3%  | 7   | 2.3%  | 0.56 | 0.20 – 1.57 | 0.252 |
| 5 or more               | 2   | 0.3%  | 2   | 0.7%  | 0.43 | 0.05 – 3.63 | 0.405 |

**Supplementary Table 5. Amount spent on different pet-related items by owners of dogs, cats, and horses in New Zealand. The median category is shown bolded.**

| Item and amount | Dogs |               | Cats |               | Horses |               |
|-----------------|------|---------------|------|---------------|--------|---------------|
|                 | N    | %             | N    | %             | N      | %             |
|                 | 443  |               | 696  |               | 32     |               |
| Food            |      |               |      |               |        |               |
| Nothing         | 3    | 0.70%         | 5    | 0.70%         | 3      | 9.40%         |
| < \$100         | 21   | 4.70%         | 45   | 6.50%         | 3      | 9.40%         |
| \$100 - \$199   | 43   | 9.70%         | 124  | 17.80%        | 6      | 18.80%        |
| \$200 - \$499   | 122  | 27.50%        | 202  | <b>29.00%</b> | 3      | 9.40%         |
| \$500 - \$999   | 110  | <b>24.80%</b> | 135  | 19.40%        | 5      | <b>15.60%</b> |
| \$1000 - \$1999 | 49   | 11.10%        | 40   | 5.70%         | 4      | 12.50%        |
| >\$2000         | 19   | 4.30%         | 13   | 1.90%         | 4      | 12.50%        |
| Don't know      | 76   | 17.20%        | 132  | 19.00%        | 4      | 12.50%        |
| Veterinarian    |      |               |      |               |        |               |
| Nothing         | 59   | 13.30%        | 227  | 32.60%        | 14     | 43.80%        |
| < \$100         | 56   | 12.60%        | 106  | 15.20%        | 4      | <b>12.50%</b> |
| \$100 - \$199   | 99   | 22.30%        | 134  | <b>19.30%</b> | 4      | 12.50%        |
| \$200 - \$499   | 92   | <b>20.80%</b> | 93   | 13.40%        | 2      | 6.30%         |
| \$500 - \$999   | 59   | 13.30%        | 58   | 8.30%         | 1      | 3.10%         |
| \$1000 - \$1999 | 16   | 3.60%         | 13   | 1.90%         | 2      | 6.30%         |
| >\$2000         | 17   | 3.80%         | 14   | 2.00%         | 1      | 3.10%         |
| Don't know      | 45   | 10.20%        | 51   | 7.30%         | 4      | 12.50%        |
| Grooming        |      |               |      |               |        |               |
| Nothing         | 235  | <b>53.00%</b> | 587  | <b>84.30%</b> | 14     | 43.80%        |
| < \$100         | 69   | 15.60%        | 45   | 6.50%         | 5      | <b>15.60%</b> |
| \$100 - \$199   | 56   | 12.60%        | 15   | 2.20%         | 3      | 9.40%         |
| \$200 - \$499   | 36   | 8.10%         | 5    | 0.70%         | 3      | 9.40%         |
| \$500 - \$999   | 11   | 2.50%         | 3    | 0.40%         | 2      | 6.30%         |
| \$1000 - \$1999 | 1    | 0.20%         | 2    | 0.30%         | 0      | 0.00%         |
| >\$2000         | 2    | 0.50%         | 0    | 0.00%         | 1      | 3.10%         |
| Don't know      | 33   | 7.40%         | 39   | 5.60%         | 4      | 12.50%        |
| Training        |      |               |      |               |        |               |
| Nothing         | 358  | <b>80.80%</b> | 645  | <b>92.70%</b> | 21     | <b>65.60%</b> |
| < \$100         | 29   | 6.50%         | 11   | 1.60%         | 3      | 9.40%         |
| \$100 - \$199   | 15   | 3.40%         | 3    | 0.40%         | 2      | 6.30%         |
| \$200 - \$499   | 8    | 1.80%         | 2    | 0.30%         | 0      | 0.00%         |

# Supplementary Information

Gates et al.

New Zealand Veterinary Journal

S11

|                 |     |               |     |               |    |               |
|-----------------|-----|---------------|-----|---------------|----|---------------|
| \$500 - \$999   | 3   | 0.70%         | 2   | 0.30%         | 2  | 6.30%         |
| \$1000 - \$1999 | 1   | 0.20%         | 0   | 0.00%         | 1  | 3.10%         |
| >\$2000         | 0   | 0.00%         | 0   | 0.00%         | 1  | 3.10%         |
| Don't know      | 29  | 6.50%         | 31  | 4.50%         | 2  | 6.30%         |
| Accessories     |     |               |     |               |    |               |
| Nothing         | 104 | 23.50%        | 346 | 49.70%        | 11 | 34.40%        |
| < \$100         | 208 | <b>47.00%</b> | 261 | <b>37.50%</b> | 5  | 15.60%        |
| \$100 - \$199   | 72  | 16.30%        | 27  | 3.90%         | 5  | <b>15.60%</b> |
| \$200 - \$499   | 13  | 2.90%         | 19  | 2.70%         | 4  | 12.50%        |
| \$500 - \$999   | 13  | 2.90%         | 2   | 0.30%         | 4  | 12.50%        |
| \$1000 - \$1999 | 2   | 0.50%         | 0   | 0.00%         | 0  | 0.00%         |
| >\$2000         | 1   | 0.20%         | 0   | 0.00%         | 1  | 3.10%         |
| Don't know      | 30  | 6.80%         | 41  | 5.90%         | 2  | 6.30%         |
| Boarding        |     |               |     |               |    |               |
| Nothing         | 300 | <b>67.70%</b> | 564 | <b>81.00%</b> | 22 | <b>68.80%</b> |
| < \$100         | 33  | 7.40%         | 28  | 4.00%         | 1  | 3.10%         |
| \$100 - \$199   | 22  | 5.00%         | 25  | 3.60%         | 2  | 6.30%         |
| \$200 - \$499   | 33  | 7.40%         | 29  | 4.20%         | 1  | 3.10%         |
| \$500 - \$999   | 15  | 3.40%         | 9   | 1.30%         | 2  | 6.30%         |
| \$1000 - \$1999 | 7   | 1.60%         | 4   | 0.60%         | 1  | 3.10%         |
| >\$2000         | 2   | 0.50%         | 1   | 0.10%         | 1  | 3.10%         |
| Don't know      | 31  | 7.00%         | 36  | 5.20%         | 2  | 6.30%         |
| Supplements     |     |               |     |               |    |               |
| Nothing         | 236 | <b>53.30%</b> | 449 | <b>64.50%</b> | 12 | 37.50%        |
| < \$100         | 101 | 22.80%        | 151 | 21.70%        | 6  | <b>18.80%</b> |
| \$100 - \$199   | 45  | 10.20%        | 35  | 5.00%         | 2  | 6.30%         |
| \$200 - \$499   | 18  | 4.10%         | 17  | 2.40%         | 3  | 9.40%         |
| \$500 - \$999   | 6   | 1.40%         | 3   | 0.40%         | 1  | 3.10%         |
| \$1000 - \$1999 | 0   | 0.00%         | 1   | 0.10%         | 2  | 6.30%         |
| >\$2000         | 1   | 0.20%         | 0   | 0.00%         | 1  | 3.10%         |
| Don't know      | 36  | 8.10%         | 40  | 5.70%         | 5  | 15.60%        |
| Insurance       |     |               |     |               |    |               |
| Nothing         | 357 | <b>80.60%</b> | 623 | <b>89.50%</b> | 27 | <b>84.40%</b> |
| < \$100         | 12  | 2.70%         | 10  | 1.40%         | 0  | 0.00%         |
| \$100 - \$199   | 22  | 5.00%         | 12  | 1.70%         | 0  | 0.00%         |

# Supplementary Information

Gates et al.

New Zealand Veterinary Journal

S12

|                 |     |               |     |               |    |               |
|-----------------|-----|---------------|-----|---------------|----|---------------|
| \$200 - \$499   | 11  | 2.50%         | 12  | 1.70%         | 2  | 6.30%         |
| \$500 - \$999   | 7   | 1.60%         | 1   | 0.10%         | 1  | 3.10%         |
| \$1000 - \$1999 | 1   | 0.20%         | 1   | 0.10%         | 0  | 0.00%         |
| >\$2000         | 1   | 0.20%         | 2   | 0.30%         | 0  | 0.00%         |
| Don't know      | 32  | 7.20%         | 35  | 5.00%         | 2  | 6.30%         |
| Registration    |     |               |     |               |    |               |
| Nothing         | 77  | 17.40%        | 591 | <b>84.90%</b> | 22 | <b>68.80%</b> |
| < \$100         | 188 | <b>42.40%</b> | 35  | 5.00%         | 3  | 9.40%         |
| \$100 - \$199   | 102 | 23.00%        | 20  | 2.90%         | 1  | 3.10%         |
| \$200 - \$499   | 23  | 5.20%         | 6   | 0.90%         | 2  | 6.30%         |
| \$500 - \$999   | 7   | 1.60%         | 1   | 0.10%         | 0  | 0.00%         |
| \$1000 - \$1999 | 4   | 0.90%         | 1   | 0.10%         | 1  | 3.10%         |
| >\$2000         | 0   | 0.00%         | 0   | 0.00%         | 0  | 0.00%         |
| Don't know      | 42  | 9.50%         | 42  | 6.00%         | 3  | 9.40%         |
| Other           |     |               |     |               |    |               |
| Nothing         | 274 | <b>61.90%</b> | 503 | <b>72.30%</b> | 14 | 43.80%        |
| < \$100         | 61  | 13.80%        | 81  | 11.60%        | 5  | <b>15.60%</b> |
| \$100 - \$199   | 23  | 5.20%         | 28  | 4.00%         | 2  | 6.30%         |
| \$200 - \$499   | 12  | 2.70%         | 2   | 0.30%         | 2  | 6.30%         |
| \$500 - \$999   | 4   | 0.90%         | 7   | 1.00%         | 1  | 3.10%         |
| \$1000 - \$1999 | 1   | 0.20%         | 1   | 0.10%         | 1  | 3.10%         |
| >\$2000         | 2   | 0.50%         | 1   | 0.10%         | 2  | 6.30%         |
| Don't know      | 66  | 14.90%        | 73  | 10.50%        | 5  | 43.80%        |
| Litter          |     |               |     |               |    |               |
| Nothing         |     |               | 395 | <b>56.80%</b> |    |               |
| < \$100         |     |               | 154 | 22.10%        |    |               |
| \$100 - \$199   |     |               | 71  | 10.20%        |    |               |
| \$200 - \$499   |     |               | 24  | 3.40%         |    |               |
| \$500 - \$999   |     |               | 5   | 0.70%         |    |               |
| \$1000 - \$1999 |     |               | 1   | 0.10%         |    |               |
| >\$2000         |     |               | 1   | 0.10%         |    |               |
| Don't know      |     |               | 45  | 6.50%         |    |               |

**Supplementary Table 6. Amount spent on different pet-related items by owners of birds, rabbits, and fish in New Zealand. The median category is shown bolded.**

| Item & amount    | Bird |              | Rabbit |              | Fish |              |
|------------------|------|--------------|--------|--------------|------|--------------|
|                  | N    | %            | N      | %            | N    | %            |
|                  | 103  |              | 55     |              | 159  |              |
| Food             |      |              |        |              |      |              |
| Nothing          | 2    | 1.9%         | 1      | 1.8%         | 8    | 5.0%         |
| < \$100          | 32   | 31.1%        | 23     | 41.8%        | 106  | <b>66.7%</b> |
| \$100 - \$199    | 30   | <b>29.1%</b> | 15     | <b>27.3%</b> | 20   | 12.6%        |
| \$200 - \$499    | 14   | 13.6%        | 8      | 14.5%        | 5    | 3.1%         |
| \$500 - \$999    | 4    | 3.9%         | 1      | 1.8%         | 5    | 3.1%         |
| \$1000 - \$1999  | 3    | 2.9%         | 1      | 1.8%         | 1    | 0.6%         |
| >\$2000          | 1    | 1.0%         | 0      | 0.0%         | 1    | 0.6%         |
| Don't know       | 17   | 16.5%        | 6      | 10.9%        | 13   | 8.2%         |
| Cage or Aquarium |      |              |        |              |      |              |
| Nothing          | 45   | 43.7%        | 19     | 34.5%        | 43   | 27.0%        |
| < \$100          | 26   | <b>25.2%</b> | 14     | <b>25.5%</b> | 55   | <b>34.6%</b> |
| \$100 - \$199    | 9    | 8.7%         | 7      | 12.7%        | 27   | 17.0%        |
| \$200 - \$499    | 7    | 6.8%         | 7      | 12.7%        | 11   | 6.9%         |
| \$500 - \$999    | 2    | 1.9%         | 3      | 5.5%         | 9    | 5.7%         |
| \$1000 - \$1999  | 2    | 1.9%         | 1      | 1.8%         | 2    | 1.3%         |
| >\$2000          | 0    | 0.0%         | 0      | 0.0%         | 1    | 0.6%         |
| Don't know       | 12   | 11.7%        | 4      | 7.3%         | 11   | 6.9%         |
| Consumables      |      |              |        |              |      |              |
| Nothing          | 43   | 41.7%        | 22     | 40.0%        | 65   | 40.9%        |
| < \$100          | 39   | <b>37.9%</b> | 18     | <b>32.7%</b> | 62   | <b>39.0%</b> |
| \$100 - \$199    | 7    | 6.8%         | 7      | 12.7%        | 12   | 7.5%         |
| \$200 - \$499    | 2    | 1.9%         | 2      | 3.6%         | 4    | 2.5%         |
| \$500 - \$999    | 1    | 1.0%         | 2      | 3.6%         | 5    | 3.1%         |
| \$1000 - \$1999  | 0    | 0.0%         | 0      | 0.0%         | 0    | 0.0%         |
| >\$2000          | 0    | 0.0%         | 0      | 0.0%         | 0    | 0.0%         |
| Don't know       | 11   | 10.7%        | 4      | 7.3%         | 11   | 6.9%         |
| Veterinarian     |      |              |        |              |      |              |
| Nothing          | 78   | <b>75.7%</b> | 33     | <b>60.0%</b> | 135  | <b>84.9%</b> |
| < \$100          | 8    | 7.8%         | 8      | 14.5%        | 9    | 5.7%         |
| \$100 - \$199    | 4    | 3.9%         | 6      | 10.9%        | 4    | 2.5%         |
| \$200 - \$499    | 3    | 2.9%         | 2      | 3.6%         | 2    | 1.3%         |

# Supplementary Information

*Gates et al.*

*New Zealand Veterinary Journal*

*S14*

|                 |    |              |    |              |     |              |
|-----------------|----|--------------|----|--------------|-----|--------------|
| \$500 - \$999   | 1  | 1.0%         | 1  | 1.8%         | 0   | 0.0%         |
| \$1000 - \$1999 | 0  | 0.0%         | 1  | 1.8%         | 0   | 0.0%         |
| >\$2000         | 0  | 0.0%         | 0  | 0.0%         | 0   | 0.0%         |
| Don't know      | 9  | 8.7%         | 4  | 7.3%         | 9   | 5.7%         |
| Other           |    |              |    |              |     |              |
| Nothing         | 70 | <b>68.0%</b> | 32 | <b>58.2%</b> | 116 | <b>73.0%</b> |
| < \$100         | 14 | 13.6%        | 13 | 23.6%        | 15  | 9.4%         |
| \$100 - \$199   | 3  | 2.9%         | 3  | 5.5%         | 7   | 4.4%         |
| \$200 - \$499   | 0  | 0.0%         | 0  | 0.0%         | 2   | 1.3%         |
| \$500 - \$999   | 2  | 1.9%         | 0  | 0.0%         | 1   | 0.6%         |
| \$1000 - \$1999 | 1  | 1.0%         | 0  | 0.0%         | 0   | 0.0%         |
| >\$2000         | 1  | 1.0%         | 2  | 3.6%         | 1   | 0.6%         |
| Don't know      | 12 | 11.7%        | 5  | 1.8%         | 17  | 10.7%        |
